# Supplementary material for: Longitudinal Patterns of Online Activity and Social Feedback Are Associated with Current and Change in Quality of Life in Adult Facebook Users
Source: Preprints.org preprint supplement (doi:10.20944/preprints202402.0136.v1), 2024-02-02
Supplement: Supplementary file 1 [file supplementary]

## CODEBOOK

GQOL and GQOLpre: These represent the latent variables for Current and Change in Quality of Life.

SalF, SalM, RelP, QOL (and their 'pre' counterparts): These variables are observed indicators for GQOL and GQOLpre. They represent Physical Health (SalF), Mental Health (SalM), Social QoL (RelP) and Overall Quality of Life (QOL) measured for current status, and for change (variable with the "pre" suffix).

x1-x12: these are observed indicators of verbal status updates for the 12 time points of the study. For each time point, the variable represents the percentage of textual status updates relative to the total number of Facebook posts.

y1-y12: these are observed indicators of received Likes for the 12 time points of the study. For each time point, the variable represents the total number of received Likes over the total number of Facebook posts.

## MODEL STRUCTURE IN MPLUS

GQOL BY SalF SalM RelP QOL\*;

GQOLpre BY SalFpre SalMpre RelPpre QOLpre\*;

SalF WITH SalFpre;

SalM WITH SalMpre;

RelP WITH RelPpre;

QOL WITH QOLpre;

! Intercept factor

ix by x1@1 x2@1 x3@1 x4@1 x5@1 x6@1 x7@1 x8@1 x9@1 x10@1 x11@1 x12@1;

sx by x1@0 x2@1 x3@2 x4@3 x5@4 x6@5 x7@6 x8@7 x9@8 x10@9 x11@10 x12@11;

iy by y1@1 y2@1 y3@1 y4@1 y5@1 y6@1 y7@1 y8@1 y9@1 y10@1 y11@1 y12@1;

sy by y1@0 y2@1 y3@2 y4@3 y5@4 y6@5 y7@6 y8@7 y9@8 y10@9 y11@10 y12@11;

! Latent variables

etax1 by x1@1;

etax2 by x2@1;

etax3 by x3@1;

etax4 by x4@1;

etax5 by x5@1;

etax6 by x6@1;

etax7 by x7@1;

etax8 by x8@1;

etax9 by x9@1;

etax10 by x10@1;

etax11 by x11@1;

etax12 by x12@1;

etay1 by y1@1;

etay2 by y2@1;

etay3 by y3@1;

etay4 by y4@1;

etay5 by y5@1;

etay6 by y6@1;

etay7 by y7@1;

etay8 by y8@1;

etay9 by y9@1;

etay10 by y10@1;

etay11 by y11@1;

etay12 by y12@1;

```
! autoregressions
etax2 on etax1 (a1);
etax3 on etax2 (a1);
etax4 on etax3 (a1);
etax5 on etax4 (a1);
etax6 on etax5 (a1);
etax7 on etax6 (a1);
etax8 on etax7 (a1);
etax9 on etax8 (a1);
etax10 on etax9 (a1);
etax11 on etax10 (a1);
etax12 on etax11 (a1);
  etay2 on etay1 (a2);
  etay3 on etay2 (a2);
  etay4 on etay3 (a2);
  etay5 on etay4 (a2);
  etay6 on etay5 (a2);
  etay7 on etay6 (a2);
  etay8 on etay7 (a2);
  etay9 on etay8 (a2);
  etay10 on etay9 (a2);
  etay11 on etay10 (a2);
  etay12 on etay11 (a2);
```

```
! crosslagged paths
etay2 on etax1 (c1);
etay3 on etax2 (c1);
etay4 on etax3 (c1);
etay5 on etax4 (c1);
etay6 on etax5 (c1);
etay7 on etax6 (c1);
etay8 on etax7 (c1);
etay9 on etax8 (c1);
etay10 on etax9 (c1);
etay11 on etax10 (c1);
etay12 on etax11 (c1);
etax2 on etay1 (c2);
etax3 on etay2 (c2);
etax4 on etay3 (c2);
etax5 on etay4 (c2);
etax6 on etay5 (c2);
etax7 on etay6 (c2);
etax8 on etay7 (c2);
etax9 on etay8 (c2);
etax10 on etay9 (c2);
etax11 on etay10 (c2);
etax12 on etay11 (c2);
```

```
! Variance structure
  x1-x12@0;
  y1-y12@0;
etax1-etax12;
etay1-etay12;
```

```

etax1 with etay1;
etax2 with etay2 (e1);
etax3 with etay3 (e1);
etax4 with etay4 (e1);
etax5 with etay5 (e1);
etax6 with etay6 (e1);
etax7 with etay7 (e1);
etax8 with etay8 (e1);
etax9 with etay9 (e1);
etax10 with etay10 (e1);
etax11 with etay11 (e1);
etax12 with etay12 (e1);

ix;
iy;
sx;
sy;

ix with sx iy sy GQOLpre GQOL;
sx with iy sy GQOLpre GQOL;
iy with sy GQOLpre GQOL;
sy with GQOLpre GQOL;
GQOL with GQOLpre;

etax1 with ix@0;
etax1 with sx@0;
etax1 with iy@0;
etax1 with sy@0;

etay1 with ix@0;
etay1 with sx@0;
etay1 with iy@0;
etay1 with sy@0;

! Mean structure
[x1-x12@0];
[y1-y12@0];
[etax1-etax12@0];
[etay1-etay12@0];
[ix iy];
[sx sy];

```

MODEL FIT INFORMATION

|                           |             |
|---------------------------|-------------|
| Number of Free Parameters | 85          |
| Loglikelihood             |             |
| H0 Value                  | -163637.761 |
| H1 Value                  | -163208.828 |

Information Criteria

|                          |            |
|--------------------------|------------|
| Akaike (AIC)             | 327445.522 |
| Bayesian (BIC)           | 327901.401 |
| Sample-Size Adjusted BIC | 327631.374 |
| (n* = (n + 2) / 24)      |            |

#### Chi-Square Test of Model Fit

|                    |         |
|--------------------|---------|
| Value              | 857.865 |
| Degrees of Freedom | 475     |
| P-Value            | 0.0000  |

#### RMSEA (Root Mean Square Error Of Approximation)

|                          |       |       |
|--------------------------|-------|-------|
| Estimate                 | 0.023 |       |
| 90 Percent C.I.          | 0.020 | 0.025 |
| Probability RMSEA <= .05 | 1.000 |       |

#### CFI/TLI

|     |       |
|-----|-------|
| CFI | 0.979 |
| TLI | 0.978 |

#### Chi-Square Test of Model Fit for the Baseline Model

|                    |           |
|--------------------|-----------|
| Value              | 18383.679 |
| Degrees of Freedom | 496       |
| P-Value            | 0.0000    |

#### SRMR (Standardized Root Mean Square Residual)

|       |       |
|-------|-------|
| Value | 0.029 |
|-------|-------|

#### MODEL RESULTS

|         |         | Estimate | S.E.  | Est./S.E. | Two-Tailed<br>P-Value |
|---------|---------|----------|-------|-----------|-----------------------|
| GQOL    | BY      |          |       |           |                       |
|         | SALF    | 1.000    | 0.000 | 999.000   | 999.000               |
|         | SALM    | 1.752    | 0.125 | 13.989    | 0.000                 |
|         | RELP    | 1.536    | 0.121 | 12.666    | 0.000                 |
|         | QOL     | 1.583    | 0.107 | 14.806    | 0.000                 |
| GQOLPRE | BY      |          |       |           |                       |
|         | SALFPRE | 1.000    | 0.000 | 999.000   | 999.000               |
|         | SALMPRE | 1.763    | 0.120 | 14.743    | 0.000                 |
|         | RELPPRE | 1.247    | 0.101 | 12.344    | 0.000                 |
|         | QOLPRE  | 1.283    | 0.103 | 12.511    | 0.000                 |
| IX      | BY      |          |       |           |                       |
|         | X1      | 1.000    | 0.000 | 999.000   | 999.000               |

|    |    |     |        |       |         |         |
|----|----|-----|--------|-------|---------|---------|
|    |    | X2  | 1.000  | 0.000 | 999.000 | 999.000 |
|    |    | X3  | 1.000  | 0.000 | 999.000 | 999.000 |
|    |    | X4  | 1.000  | 0.000 | 999.000 | 999.000 |
|    |    | X5  | 1.000  | 0.000 | 999.000 | 999.000 |
|    |    | X6  | 1.000  | 0.000 | 999.000 | 999.000 |
|    |    | X7  | 1.000  | 0.000 | 999.000 | 999.000 |
|    |    | X8  | 1.000  | 0.000 | 999.000 | 999.000 |
|    |    | X9  | 1.000  | 0.000 | 999.000 | 999.000 |
|    |    | X10 | 1.000  | 0.000 | 999.000 | 999.000 |
|    |    | X11 | 1.000  | 0.000 | 999.000 | 999.000 |
|    |    | X12 | 1.000  | 0.000 | 999.000 | 999.000 |
| SX | BY |     |        |       |         |         |
|    |    | X1  | 0.000  | 0.000 | 999.000 | 999.000 |
|    |    | X2  | 1.000  | 0.000 | 999.000 | 999.000 |
|    |    | X3  | 2.000  | 0.000 | 999.000 | 999.000 |
|    |    | X4  | 3.000  | 0.000 | 999.000 | 999.000 |
|    |    | X5  | 4.000  | 0.000 | 999.000 | 999.000 |
|    |    | X6  | 5.000  | 0.000 | 999.000 | 999.000 |
|    |    | X7  | 6.000  | 0.000 | 999.000 | 999.000 |
|    |    | X8  | 7.000  | 0.000 | 999.000 | 999.000 |
|    |    | X9  | 8.000  | 0.000 | 999.000 | 999.000 |
|    |    | X10 | 9.000  | 0.000 | 999.000 | 999.000 |
|    |    | X11 | 10.000 | 0.000 | 999.000 | 999.000 |
|    |    | X12 | 11.000 | 0.000 | 999.000 | 999.000 |
| IY | BY |     |        |       |         |         |
|    |    | Y1  | 1.000  | 0.000 | 999.000 | 999.000 |
|    |    | Y2  | 1.000  | 0.000 | 999.000 | 999.000 |
|    |    | Y3  | 1.000  | 0.000 | 999.000 | 999.000 |
|    |    | Y4  | 1.000  | 0.000 | 999.000 | 999.000 |
|    |    | Y5  | 1.000  | 0.000 | 999.000 | 999.000 |
|    |    | Y6  | 1.000  | 0.000 | 999.000 | 999.000 |
|    |    | Y7  | 1.000  | 0.000 | 999.000 | 999.000 |
|    |    | Y8  | 1.000  | 0.000 | 999.000 | 999.000 |
|    |    | Y9  | 1.000  | 0.000 | 999.000 | 999.000 |
|    |    | Y10 | 1.000  | 0.000 | 999.000 | 999.000 |
|    |    | Y11 | 1.000  | 0.000 | 999.000 | 999.000 |
|    |    | Y12 | 1.000  | 0.000 | 999.000 | 999.000 |
| SY | BY |     |        |       |         |         |
|    |    | Y1  | 0.000  | 0.000 | 999.000 | 999.000 |
|    |    | Y2  | 1.000  | 0.000 | 999.000 | 999.000 |
|    |    | Y3  | 2.000  | 0.000 | 999.000 | 999.000 |
|    |    | Y4  | 3.000  | 0.000 | 999.000 | 999.000 |
|    |    | Y5  | 4.000  | 0.000 | 999.000 | 999.000 |
|    |    | Y6  | 5.000  | 0.000 | 999.000 | 999.000 |
|    |    | Y7  | 6.000  | 0.000 | 999.000 | 999.000 |
|    |    | Y8  | 7.000  | 0.000 | 999.000 | 999.000 |
|    |    | Y9  | 8.000  | 0.000 | 999.000 | 999.000 |
|    |    | Y10 | 9.000  | 0.000 | 999.000 | 999.000 |
|    |    | Y11 | 10.000 | 0.000 | 999.000 | 999.000 |
|    |    | Y12 | 11.000 | 0.000 | 999.000 | 999.000 |

|               |    |       |       |         |         |
|---------------|----|-------|-------|---------|---------|
| ETAX1<br>X1   | BY | 1.000 | 0.000 | 999.000 | 999.000 |
| ETAX2<br>X2   | BY | 1.000 | 0.000 | 999.000 | 999.000 |
| ETAX3<br>X3   | BY | 1.000 | 0.000 | 999.000 | 999.000 |
| ETAX4<br>X4   | BY | 1.000 | 0.000 | 999.000 | 999.000 |
| ETAX5<br>X5   | BY | 1.000 | 0.000 | 999.000 | 999.000 |
| ETAX6<br>X6   | BY | 1.000 | 0.000 | 999.000 | 999.000 |
| ETAX7<br>X7   | BY | 1.000 | 0.000 | 999.000 | 999.000 |
| ETAX8<br>X8   | BY | 1.000 | 0.000 | 999.000 | 999.000 |
| ETAX9<br>X9   | BY | 1.000 | 0.000 | 999.000 | 999.000 |
| ETAX10<br>X10 | BY | 1.000 | 0.000 | 999.000 | 999.000 |
| ETAX11<br>X11 | BY | 1.000 | 0.000 | 999.000 | 999.000 |
| ETAX12<br>X12 | BY | 1.000 | 0.000 | 999.000 | 999.000 |
| ETAY1<br>Y1   | BY | 1.000 | 0.000 | 999.000 | 999.000 |
| ETAY2<br>Y2   | BY | 1.000 | 0.000 | 999.000 | 999.000 |
| ETAY3<br>Y3   | BY | 1.000 | 0.000 | 999.000 | 999.000 |
| ETAY4<br>Y4   | BY | 1.000 | 0.000 | 999.000 | 999.000 |
| ETAY5<br>Y5   | BY | 1.000 | 0.000 | 999.000 | 999.000 |
| ETAY6<br>Y6   | BY | 1.000 | 0.000 | 999.000 | 999.000 |

|        |    |       |       |         |         |
|--------|----|-------|-------|---------|---------|
| ETAY7  | BY | 1.000 | 0.000 | 999.000 | 999.000 |
| Y7     |    |       |       |         |         |
| ETAY8  | BY | 1.000 | 0.000 | 999.000 | 999.000 |
| Y8     |    |       |       |         |         |
| ETAY9  | BY | 1.000 | 0.000 | 999.000 | 999.000 |
| Y9     |    |       |       |         |         |
| ETAY10 | BY | 1.000 | 0.000 | 999.000 | 999.000 |
| Y10    |    |       |       |         |         |
| ETAY11 | BY | 1.000 | 0.000 | 999.000 | 999.000 |
| Y11    |    |       |       |         |         |
| ETAY12 | BY | 1.000 | 0.000 | 999.000 | 999.000 |
| Y12    |    |       |       |         |         |
| ETAX2  | ON |       |       |         |         |
| ETAX1  |    | 0.036 | 0.014 | 2.664   | 0.008   |
| ETAY1  |    | 0.030 | 0.028 | 1.055   | 0.291   |
| ETAX3  | ON |       |       |         |         |
| ETAX2  |    | 0.036 | 0.014 | 2.664   | 0.008   |
| ETAY2  |    | 0.030 | 0.028 | 1.055   | 0.291   |
| ETAX4  | ON |       |       |         |         |
| ETAX3  |    | 0.036 | 0.014 | 2.664   | 0.008   |
| ETAY3  |    | 0.030 | 0.028 | 1.055   | 0.291   |
| ETAX5  | ON |       |       |         |         |
| ETAX4  |    | 0.036 | 0.014 | 2.664   | 0.008   |
| ETAY4  |    | 0.030 | 0.028 | 1.055   | 0.291   |
| ETAX6  | ON |       |       |         |         |
| ETAX5  |    | 0.036 | 0.014 | 2.664   | 0.008   |
| ETAY5  |    | 0.030 | 0.028 | 1.055   | 0.291   |
| ETAX7  | ON |       |       |         |         |
| ETAX6  |    | 0.036 | 0.014 | 2.664   | 0.008   |
| ETAY6  |    | 0.030 | 0.028 | 1.055   | 0.291   |
| ETAX8  | ON |       |       |         |         |
| ETAX7  |    | 0.036 | 0.014 | 2.664   | 0.008   |
| ETAY7  |    | 0.030 | 0.028 | 1.055   | 0.291   |
| ETAX9  | ON |       |       |         |         |
| ETAX8  |    | 0.036 | 0.014 | 2.664   | 0.008   |
| ETAY8  |    | 0.030 | 0.028 | 1.055   | 0.291   |
| ETAX10 | ON |       |       |         |         |
| ETAX9  |    | 0.036 | 0.014 | 2.664   | 0.008   |
| ETAY9  |    | 0.030 | 0.028 | 1.055   | 0.291   |

|        |      |        |        |        |       |
|--------|------|--------|--------|--------|-------|
| ETAX11 | ON   |        |        |        |       |
| ETAX10 |      | 0.036  | 0.014  | 2.664  | 0.008 |
| ETAY10 |      | 0.030  | 0.028  | 1.055  | 0.291 |
| ETAX12 | ON   |        |        |        |       |
| ETAX11 |      | 0.036  | 0.014  | 2.664  | 0.008 |
| ETAY11 |      | 0.030  | 0.028  | 1.055  | 0.291 |
| ETAY2  | ON   |        |        |        |       |
| ETAY1  |      | 0.030  | 0.017  | 1.754  | 0.079 |
| ETAX1  |      | -0.005 | 0.006  | -0.978 | 0.328 |
| ETAY3  | ON   |        |        |        |       |
| ETAY2  |      | 0.030  | 0.017  | 1.754  | 0.079 |
| ETAX2  |      | -0.005 | 0.006  | -0.978 | 0.328 |
| ETAY4  | ON   |        |        |        |       |
| ETAY3  |      | 0.030  | 0.017  | 1.754  | 0.079 |
| ETAX3  |      | -0.005 | 0.006  | -0.978 | 0.328 |
| ETAY5  | ON   |        |        |        |       |
| ETAY4  |      | 0.030  | 0.017  | 1.754  | 0.079 |
| ETAX4  |      | -0.005 | 0.006  | -0.978 | 0.328 |
| ETAY6  | ON   |        |        |        |       |
| ETAY5  |      | 0.030  | 0.017  | 1.754  | 0.079 |
| ETAX5  |      | -0.005 | 0.006  | -0.978 | 0.328 |
| ETAY7  | ON   |        |        |        |       |
| ETAY6  |      | 0.030  | 0.017  | 1.754  | 0.079 |
| ETAX6  |      | -0.005 | 0.006  | -0.978 | 0.328 |
| ETAY8  | ON   |        |        |        |       |
| ETAY7  |      | 0.030  | 0.017  | 1.754  | 0.079 |
| ETAX7  |      | -0.005 | 0.006  | -0.978 | 0.328 |
| ETAY9  | ON   |        |        |        |       |
| ETAY8  |      | 0.030  | 0.017  | 1.754  | 0.079 |
| ETAX8  |      | -0.005 | 0.006  | -0.978 | 0.328 |
| ETAY10 | ON   |        |        |        |       |
| ETAY9  |      | 0.030  | 0.017  | 1.754  | 0.079 |
| ETAX9  |      | -0.005 | 0.006  | -0.978 | 0.328 |
| ETAY11 | ON   |        |        |        |       |
| ETAY10 |      | 0.030  | 0.017  | 1.754  | 0.079 |
| ETAX10 |      | -0.005 | 0.006  | -0.978 | 0.328 |
| ETAY12 | ON   |        |        |        |       |
| ETAY11 |      | 0.030  | 0.017  | 1.754  | 0.079 |
| ETAX11 |      | -0.005 | 0.006  | -0.978 | 0.328 |
| ETAX1  | WITH |        |        |        |       |
| ETAY1  |      | 39.140 | 11.022 | 3.551  | 0.000 |



|                       |         |       |         |         |
|-----------------------|---------|-------|---------|---------|
| IX                    | 0.000   | 0.000 | 999.000 | 999.000 |
| SX                    | 0.000   | 0.000 | 999.000 | 999.000 |
| IY                    | 0.000   | 0.000 | 999.000 | 999.000 |
| SY                    | 0.000   | 0.000 | 999.000 | 999.000 |
| GQOL                  | -0.186  | 0.310 | -0.599  | 0.549   |
| GQOLPRE               | 0.046   | 0.320 | 0.143   | 0.886   |
| ETAX2 WITH<br>ETAY2   | 35.984  | 3.417 | 10.532  | 0.000   |
| ETAX3 WITH<br>ETAY3   | 35.984  | 3.417 | 10.532  | 0.000   |
| ETAX4 WITH<br>ETAY4   | 35.984  | 3.417 | 10.532  | 0.000   |
| ETAX5 WITH<br>ETAY5   | 35.984  | 3.417 | 10.532  | 0.000   |
| ETAX6 WITH<br>ETAY6   | 35.984  | 3.417 | 10.532  | 0.000   |
| ETAX7 WITH<br>ETAY7   | 35.984  | 3.417 | 10.532  | 0.000   |
| ETAX8 WITH<br>ETAY8   | 35.984  | 3.417 | 10.532  | 0.000   |
| ETAX9 WITH<br>ETAY9   | 35.984  | 3.417 | 10.532  | 0.000   |
| ETAX10 WITH<br>ETAY10 | 35.984  | 3.417 | 10.532  | 0.000   |
| ETAX11 WITH<br>ETAY11 | 35.984  | 3.417 | 10.532  | 0.000   |
| ETAX12 WITH<br>ETAY12 | 35.984  | 3.417 | 10.532  | 0.000   |
| IX WITH<br>SX         | -6.465  | 2.178 | -2.968  | 0.003   |
| IY                    | 122.197 | 9.310 | 13.126  | 0.000   |
| SY                    | -2.976  | 0.892 | -3.338  | 0.001   |
| GQOLPRE               | 0.604   | 0.326 | 1.849   | 0.065   |
| GQOL                  | 0.810   | 0.323 | 2.506   | 0.012   |
| ETAY1                 | 0.000   | 0.000 | 999.000 | 999.000 |
| SX WITH<br>IY         | -1.792  | 0.810 | -2.212  | 0.027   |
| SY                    | 0.212   | 0.102 | 2.078   | 0.038   |
| GQOLPRE               | 0.006   | 0.032 | 0.176   | 0.861   |
| GQOL                  | -0.013  | 0.031 | -0.413  | 0.679   |
| ETAY1                 | 0.000   | 0.000 | 999.000 | 999.000 |

|            |      |        |       |         |         |
|------------|------|--------|-------|---------|---------|
| IY         | WITH |        |       |         |         |
| SY         |      | -3.112 | 0.742 | -4.197  | 0.000   |
| GQOLPRE    |      | 0.215  | 0.149 | 1.439   | 0.150   |
| GQOL       |      | 0.756  | 0.151 | 5.006   | 0.000   |
| ETAY1      |      | 0.000  | 0.000 | 999.000 | 999.000 |
| SY         | WITH |        |       |         |         |
| GQOLPRE    |      | 0.035  | 0.013 | 2.620   | 0.009   |
| GQOL       |      | -0.006 | 0.011 | -0.521  | 0.602   |
| ETAY1      |      | 0.000  | 0.000 | 999.000 | 999.000 |
| GQOL       | WITH |        |       |         |         |
| GQOLPRE    |      | 0.084  | 0.010 | 8.798   | 0.000   |
| ETAY1      | WITH |        |       |         |         |
| GQOL       |      | -0.142 | 0.118 | -1.207  | 0.228   |
| GQOLPRE    |      | 0.213  | 0.146 | 1.459   | 0.145   |
| SALF       | WITH |        |       |         |         |
| SALFPRE    |      | 0.134  | 0.016 | 8.196   | 0.000   |
| SALM       | WITH |        |       |         |         |
| SALMPRE    |      | 0.127  | 0.019 | 6.865   | 0.000   |
| RELP       | WITH |        |       |         |         |
| RELPPRE    |      | 0.200  | 0.018 | 11.312  | 0.000   |
| QOL        | WITH |        |       |         |         |
| QOLPRE     |      | 0.035  | 0.012 | 2.964   | 0.003   |
| Means      |      |        |       |         |         |
| IX         |      | 55.321 | 0.686 | 80.646  | 0.000   |
| SX         |      | -0.186 | 0.066 | -2.800  | 0.005   |
| IY         |      | 13.150 | 0.318 | 41.351  | 0.000   |
| SY         |      | -0.195 | 0.029 | -6.673  | 0.000   |
| ETAX1      |      | 0.000  | 0.000 | 999.000 | 999.000 |
| ETAY1      |      | 0.000  | 0.000 | 999.000 | 999.000 |
| Intercepts |      |        |       |         |         |
| SALF       |      | 3.809  | 0.020 | 189.848 | 0.000   |
| SALFPRE    |      | 3.167  | 0.021 | 148.291 | 0.000   |
| SALM       |      | 3.193  | 0.025 | 127.316 | 0.000   |
| SALMPRE    |      | 3.256  | 0.025 | 132.812 | 0.000   |
| RELP       |      | 3.669  | 0.023 | 156.783 | 0.000   |
| RELPPRE    |      | 3.410  | 0.022 | 155.263 | 0.000   |
| QOL        |      | 3.864  | 0.019 | 207.056 | 0.000   |
| QOLPRE     |      | 3.400  | 0.019 | 183.584 | 0.000   |
| Y1         |      | 0.000  | 0.000 | 999.000 | 999.000 |
| Y2         |      | 0.000  | 0.000 | 999.000 | 999.000 |
| Y3         |      | 0.000  | 0.000 | 999.000 | 999.000 |
| Y4         |      | 0.000  | 0.000 | 999.000 | 999.000 |
| Y5         |      | 0.000  | 0.000 | 999.000 | 999.000 |
| Y6         |      | 0.000  | 0.000 | 999.000 | 999.000 |

|                    |         |        |         |         |
|--------------------|---------|--------|---------|---------|
| Y7                 | 0.000   | 0.000  | 999.000 | 999.000 |
| Y8                 | 0.000   | 0.000  | 999.000 | 999.000 |
| Y9                 | 0.000   | 0.000  | 999.000 | 999.000 |
| Y10                | 0.000   | 0.000  | 999.000 | 999.000 |
| Y11                | 0.000   | 0.000  | 999.000 | 999.000 |
| Y12                | 0.000   | 0.000  | 999.000 | 999.000 |
| X1                 | 0.000   | 0.000  | 999.000 | 999.000 |
| X2                 | 0.000   | 0.000  | 999.000 | 999.000 |
| X3                 | 0.000   | 0.000  | 999.000 | 999.000 |
| X4                 | 0.000   | 0.000  | 999.000 | 999.000 |
| X5                 | 0.000   | 0.000  | 999.000 | 999.000 |
| X6                 | 0.000   | 0.000  | 999.000 | 999.000 |
| X7                 | 0.000   | 0.000  | 999.000 | 999.000 |
| X8                 | 0.000   | 0.000  | 999.000 | 999.000 |
| X9                 | 0.000   | 0.000  | 999.000 | 999.000 |
| X10                | 0.000   | 0.000  | 999.000 | 999.000 |
| X11                | 0.000   | 0.000  | 999.000 | 999.000 |
| X12                | 0.000   | 0.000  | 999.000 | 999.000 |
| ETAX2              | 0.000   | 0.000  | 999.000 | 999.000 |
| ETAX3              | 0.000   | 0.000  | 999.000 | 999.000 |
| ETAX4              | 0.000   | 0.000  | 999.000 | 999.000 |
| ETAX5              | 0.000   | 0.000  | 999.000 | 999.000 |
| ETAX6              | 0.000   | 0.000  | 999.000 | 999.000 |
| ETAX7              | 0.000   | 0.000  | 999.000 | 999.000 |
| ETAX8              | 0.000   | 0.000  | 999.000 | 999.000 |
| ETAX9              | 0.000   | 0.000  | 999.000 | 999.000 |
| ETAX10             | 0.000   | 0.000  | 999.000 | 999.000 |
| ETAX11             | 0.000   | 0.000  | 999.000 | 999.000 |
| ETAX12             | 0.000   | 0.000  | 999.000 | 999.000 |
| ETAY2              | 0.000   | 0.000  | 999.000 | 999.000 |
| ETAY3              | 0.000   | 0.000  | 999.000 | 999.000 |
| ETAY4              | 0.000   | 0.000  | 999.000 | 999.000 |
| ETAY5              | 0.000   | 0.000  | 999.000 | 999.000 |
| ETAY6              | 0.000   | 0.000  | 999.000 | 999.000 |
| ETAY7              | 0.000   | 0.000  | 999.000 | 999.000 |
| ETAY8              | 0.000   | 0.000  | 999.000 | 999.000 |
| ETAY9              | 0.000   | 0.000  | 999.000 | 999.000 |
| ETAY10             | 0.000   | 0.000  | 999.000 | 999.000 |
| ETAY11             | 0.000   | 0.000  | 999.000 | 999.000 |
| ETAY12             | 0.000   | 0.000  | 999.000 | 999.000 |
| Variances          |         |        |         |         |
| GQOL               | 0.134   | 0.017  | 7.864   | 0.000   |
| GQOLPRE            | 0.142   | 0.019  | 7.593   | 0.000   |
| IX                 | 564.798 | 22.859 | 24.708  | 0.000   |
| SX                 | 1.789   | 0.332  | 5.383   | 0.000   |
| IY                 | 110.767 | 9.999  | 11.078  | 0.000   |
| SY                 | 0.277   | 0.078  | 3.560   | 0.000   |
| ETAX1              | 577.868 | 31.751 | 18.200  | 0.000   |
| ETAY1              | 101.381 | 10.364 | 9.782   | 0.000   |
| Residual Variances |         |        |         |         |
| SALF               | 0.478   | 0.024  | 19.912  | 0.000   |
| SALFPRE            | 0.554   | 0.023  | 24.079  | 0.000   |

|         |         |        |         |         |
|---------|---------|--------|---------|---------|
| SALM    | 0.555   | 0.031  | 18.094  | 0.000   |
| SALMPRE | 0.481   | 0.031  | 15.316  | 0.000   |
| RELP    | 0.592   | 0.031  | 19.362  | 0.000   |
| RELPPRE | 0.489   | 0.021  | 23.666  | 0.000   |
| QOL     | 0.227   | 0.017  | 13.577  | 0.000   |
| QOLPRE  | 0.298   | 0.019  | 15.449  | 0.000   |
| Y1      | 0.000   | 0.000  | 999.000 | 999.000 |
| Y2      | 0.000   | 0.000  | 999.000 | 999.000 |
| Y3      | 0.000   | 0.000  | 999.000 | 999.000 |
| Y4      | 0.000   | 0.000  | 999.000 | 999.000 |
| Y5      | 0.000   | 0.000  | 999.000 | 999.000 |
| Y6      | 0.000   | 0.000  | 999.000 | 999.000 |
| Y7      | 0.000   | 0.000  | 999.000 | 999.000 |
| Y8      | 0.000   | 0.000  | 999.000 | 999.000 |
| Y9      | 0.000   | 0.000  | 999.000 | 999.000 |
| Y10     | 0.000   | 0.000  | 999.000 | 999.000 |
| Y11     | 0.000   | 0.000  | 999.000 | 999.000 |
| Y12     | 0.000   | 0.000  | 999.000 | 999.000 |
| X1      | 0.000   | 0.000  | 999.000 | 999.000 |
| X2      | 0.000   | 0.000  | 999.000 | 999.000 |
| X3      | 0.000   | 0.000  | 999.000 | 999.000 |
| X4      | 0.000   | 0.000  | 999.000 | 999.000 |
| X5      | 0.000   | 0.000  | 999.000 | 999.000 |
| X6      | 0.000   | 0.000  | 999.000 | 999.000 |
| X7      | 0.000   | 0.000  | 999.000 | 999.000 |
| X8      | 0.000   | 0.000  | 999.000 | 999.000 |
| X9      | 0.000   | 0.000  | 999.000 | 999.000 |
| X10     | 0.000   | 0.000  | 999.000 | 999.000 |
| X11     | 0.000   | 0.000  | 999.000 | 999.000 |
| X12     | 0.000   | 0.000  | 999.000 | 999.000 |
| ETAX2   | 607.205 | 31.340 | 19.375  | 0.000   |
| ETAX3   | 591.736 | 28.502 | 20.761  | 0.000   |
| ETAX4   | 565.474 | 25.663 | 22.035  | 0.000   |
| ETAX5   | 596.660 | 27.933 | 21.360  | 0.000   |
| ETAX6   | 551.991 | 25.262 | 21.850  | 0.000   |
| ETAX7   | 598.718 | 26.805 | 22.336  | 0.000   |
| ETAX8   | 573.717 | 25.098 | 22.860  | 0.000   |
| ETAX9   | 624.638 | 29.282 | 21.332  | 0.000   |
| ETAX10  | 615.176 | 28.482 | 21.598  | 0.000   |
| ETAX11  | 612.222 | 30.759 | 19.904  | 0.000   |
| ETAX12  | 719.858 | 34.883 | 20.636  | 0.000   |
| ETAY2   | 129.041 | 12.257 | 10.528  | 0.000   |
| ETAY3   | 123.704 | 10.882 | 11.368  | 0.000   |
| ETAY4   | 132.579 | 11.831 | 11.206  | 0.000   |
| ETAY5   | 129.655 | 11.173 | 11.605  | 0.000   |
| ETAY6   | 106.030 | 8.766  | 12.096  | 0.000   |
| ETAY7   | 99.172  | 8.440  | 11.751  | 0.000   |
| ETAY8   | 89.085  | 7.410  | 12.023  | 0.000   |
| ETAY9   | 80.545  | 6.832  | 11.789  | 0.000   |
| ETAY10  | 100.910 | 8.587  | 11.752  | 0.000   |
| ETAY11  | 92.295  | 7.926  | 11.644  | 0.000   |
| ETAY12  | 126.338 | 10.943 | 11.545  | 0.000   |

## STANDARDIZED MODEL RESULTS

## STDYX Standardization

|            | Estimate | S.E.  | Est./S.E. | Two-Tailed<br>P-Value |
|------------|----------|-------|-----------|-----------------------|
| GQOL BY    |          |       |           |                       |
| SALF       | 0.468    | 0.028 | 16.843    | 0.000                 |
| SALM       | 0.653    | 0.022 | 29.399    | 0.000                 |
| RELP       | 0.590    | 0.024 | 24.793    | 0.000                 |
| QOL        | 0.772    | 0.021 | 37.593    | 0.000                 |
| GQOLPRE BY |          |       |           |                       |
| SALFPRE    | 0.452    | 0.028 | 16.351    | 0.000                 |
| SALMPRE    | 0.692    | 0.024 | 29.101    | 0.000                 |
| RELPPRE    | 0.558    | 0.025 | 22.474    | 0.000                 |
| QOLPRE     | 0.663    | 0.025 | 26.271    | 0.000                 |
| IX BY      |          |       |           |                       |
| X1         | 0.703    | 0.014 | 50.024    | 0.000                 |
| X2         | 0.697    | 0.015 | 48.076    | 0.000                 |
| X3         | 0.704    | 0.014 | 49.515    | 0.000                 |
| X4         | 0.714    | 0.015 | 49.165    | 0.000                 |
| X5         | 0.704    | 0.014 | 48.926    | 0.000                 |
| X6         | 0.717    | 0.015 | 48.443    | 0.000                 |
| X7         | 0.700    | 0.015 | 47.048    | 0.000                 |
| X8         | 0.705    | 0.015 | 47.318    | 0.000                 |
| X9         | 0.686    | 0.015 | 47.150    | 0.000                 |
| X10        | 0.683    | 0.015 | 46.187    | 0.000                 |
| X11        | 0.678    | 0.016 | 43.483    | 0.000                 |
| X12        | 0.644    | 0.015 | 43.784    | 0.000                 |
| SX BY      |          |       |           |                       |
| X1         | 0.000    | 0.000 | 0.000     | 1.000                 |
| X2         | 0.039    | 0.004 | 10.520    | 0.000                 |
| X3         | 0.079    | 0.007 | 10.600    | 0.000                 |
| X4         | 0.121    | 0.011 | 10.481    | 0.000                 |
| X5         | 0.158    | 0.015 | 10.590    | 0.000                 |
| X6         | 0.202    | 0.019 | 10.571    | 0.000                 |
| X7         | 0.237    | 0.023 | 10.443    | 0.000                 |
| X8         | 0.278    | 0.026 | 10.538    | 0.000                 |
| X9         | 0.309    | 0.029 | 10.529    | 0.000                 |
| X10        | 0.346    | 0.033 | 10.560    | 0.000                 |
| X11        | 0.382    | 0.036 | 10.496    | 0.000                 |
| X12        | 0.399    | 0.038 | 10.570    | 0.000                 |
| IY BY      |          |       |           |                       |
| Y1         | 0.723    | 0.021 | 33.928    | 0.000                 |
| Y2         | 0.688    | 0.026 | 26.956    | 0.000                 |
| Y3         | 0.704    | 0.026 | 27.243    | 0.000                 |
| Y4         | 0.698    | 0.028 | 24.917    | 0.000                 |
| Y5         | 0.709    | 0.029 | 24.310    | 0.000                 |

|        |    |     |       |       |        |       |
|--------|----|-----|-------|-------|--------|-------|
|        |    | Y6  | 0.758 | 0.030 | 25.672 | 0.000 |
|        |    | Y7  | 0.779 | 0.032 | 24.440 | 0.000 |
|        |    | Y8  | 0.807 | 0.034 | 23.525 | 0.000 |
|        |    | Y9  | 0.834 | 0.038 | 22.025 | 0.000 |
|        |    | Y10 | 0.788 | 0.038 | 21.012 | 0.000 |
|        |    | Y11 | 0.810 | 0.038 | 21.141 | 0.000 |
|        |    | Y12 | 0.740 | 0.038 | 19.684 | 0.000 |
| SY     | BY |     |       |       |        |       |
|        |    | Y1  | 0.000 | 0.000 | 0.000  | 1.000 |
|        |    | Y2  | 0.034 | 0.005 | 6.845  | 0.000 |
|        |    | Y3  | 0.070 | 0.010 | 6.932  | 0.000 |
|        |    | Y4  | 0.105 | 0.015 | 6.810  | 0.000 |
|        |    | Y5  | 0.142 | 0.021 | 6.844  | 0.000 |
|        |    | Y6  | 0.190 | 0.028 | 6.849  | 0.000 |
|        |    | Y7  | 0.234 | 0.034 | 6.947  | 0.000 |
|        |    | Y8  | 0.283 | 0.042 | 6.721  | 0.000 |
|        |    | Y9  | 0.334 | 0.049 | 6.760  | 0.000 |
|        |    | Y10 | 0.355 | 0.053 | 6.732  | 0.000 |
|        |    | Y11 | 0.405 | 0.059 | 6.815  | 0.000 |
|        |    | Y12 | 0.407 | 0.061 | 6.722  | 0.000 |
| ETAX1  | BY |     |       |       |        |       |
|        |    | X1  | 0.711 | 0.014 | 51.148 | 0.000 |
| ETAX2  | BY |     |       |       |        |       |
|        |    | X2  | 0.723 | 0.013 | 57.476 | 0.000 |
| ETAX3  | BY |     |       |       |        |       |
|        |    | X3  | 0.721 | 0.012 | 62.046 | 0.000 |
| ETAX4  | BY |     |       |       |        |       |
|        |    | X4  | 0.715 | 0.011 | 65.206 | 0.000 |
| ETAX5  | BY |     |       |       |        |       |
|        |    | X5  | 0.724 | 0.011 | 68.310 | 0.000 |
| ETAX6  | BY |     |       |       |        |       |
|        |    | X6  | 0.710 | 0.011 | 67.264 | 0.000 |
| ETAX7  | BY |     |       |       |        |       |
|        |    | X7  | 0.722 | 0.010 | 70.328 | 0.000 |
| ETAX8  | BY |     |       |       |        |       |
|        |    | X8  | 0.711 | 0.010 | 68.173 | 0.000 |
| ETAX9  | BY |     |       |       |        |       |
|        |    | X9  | 0.722 | 0.011 | 65.957 | 0.000 |
| ETAX10 | BY |     |       |       |        |       |
|        |    | X10 | 0.714 | 0.011 | 62.302 | 0.000 |
| ETAX11 | BY |     |       |       |        |       |
|        |    | X11 | 0.707 | 0.013 | 56.318 | 0.000 |

|        |    |       |       |        |       |
|--------|----|-------|-------|--------|-------|
| ETAX12 | BY |       |       |        |       |
| X12    |    | 0.728 | 0.013 | 57.846 | 0.000 |
| ETAY1  | BY |       |       |        |       |
| Y1     |    | 0.691 | 0.022 | 31.129 | 0.000 |
| ETAY2  | BY |       |       |        |       |
| Y2     |    | 0.743 | 0.021 | 35.803 | 0.000 |
| ETAY3  | BY |       |       |        |       |
| Y3     |    | 0.745 | 0.019 | 39.288 | 0.000 |
| ETAY4  | BY |       |       |        |       |
| Y4     |    | 0.764 | 0.018 | 42.927 | 0.000 |
| ETAY5  | BY |       |       |        |       |
| Y5     |    | 0.768 | 0.017 | 46.288 | 0.000 |
| ETAY6  | BY |       |       |        |       |
| Y6     |    | 0.742 | 0.016 | 45.193 | 0.000 |
| ETAY7  | BY |       |       |        |       |
| Y7     |    | 0.737 | 0.017 | 44.480 | 0.000 |
| ETAY8  | BY |       |       |        |       |
| Y8     |    | 0.724 | 0.017 | 42.247 | 0.000 |
| ETAY9  | BY |       |       |        |       |
| Y9     |    | 0.711 | 0.017 | 41.761 | 0.000 |
| ETAY10 | BY |       |       |        |       |
| Y10    |    | 0.753 | 0.018 | 42.579 | 0.000 |
| ETAY11 | BY |       |       |        |       |
| Y11    |    | 0.740 | 0.018 | 41.747 | 0.000 |
| ETAY12 | BY |       |       |        |       |
| Y12    |    | 0.791 | 0.018 | 44.118 | 0.000 |
| ETAX2  | ON |       |       |        |       |
| ETAX1  |    | 0.036 | 0.013 | 2.647  | 0.008 |
| ETAY1  |    | 0.012 | 0.011 | 1.061  | 0.289 |
| ETAX3  | ON |       |       |        |       |
| ETAX2  |    | 0.037 | 0.014 | 2.654  | 0.008 |
| ETAY2  |    | 0.014 | 0.013 | 1.061  | 0.289 |
| ETAX4  | ON |       |       |        |       |
| ETAX3  |    | 0.037 | 0.014 | 2.654  | 0.008 |
| ETAY3  |    | 0.014 | 0.013 | 1.053  | 0.292 |
| ETAX5  | ON |       |       |        |       |
| ETAX4  |    | 0.036 | 0.013 | 2.646  | 0.008 |

|        |    |        |       |        |       |
|--------|----|--------|-------|--------|-------|
| ETAY4  |    | 0.014  | 0.013 | 1.051  | 0.293 |
| ETAX6  | ON |        |       |        |       |
| ETAX5  |    | 0.038  | 0.014 | 2.626  | 0.009 |
| ETAY5  |    | 0.014  | 0.014 | 1.048  | 0.295 |
| ETAX7  | ON |        |       |        |       |
| ETAX6  |    | 0.035  | 0.013 | 2.680  | 0.007 |
| ETAY6  |    | 0.012  | 0.012 | 1.051  | 0.293 |
| ETAX8  | ON |        |       |        |       |
| ETAX7  |    | 0.037  | 0.014 | 2.635  | 0.008 |
| ETAY7  |    | 0.012  | 0.012 | 1.054  | 0.292 |
| ETAX9  | ON |        |       |        |       |
| ETAX8  |    | 0.035  | 0.013 | 2.664  | 0.008 |
| ETAY8  |    | 0.011  | 0.011 | 1.057  | 0.291 |
| ETAX10 | ON |        |       |        |       |
| ETAX9  |    | 0.037  | 0.014 | 2.671  | 0.008 |
| ETAY9  |    | 0.011  | 0.010 | 1.051  | 0.293 |
| ETAX11 | ON |        |       |        |       |
| ETAX10 |    | 0.037  | 0.014 | 2.652  | 0.008 |
| ETAY10 |    | 0.012  | 0.011 | 1.056  | 0.291 |
| ETAX12 | ON |        |       |        |       |
| ETAX11 |    | 0.034  | 0.013 | 2.661  | 0.008 |
| ETAY11 |    | 0.011  | 0.010 | 1.053  | 0.292 |
| ETAY2  | ON |        |       |        |       |
| ETAY1  |    | 0.027  | 0.015 | 1.741  | 0.082 |
| ETAX1  |    | -0.012 | 0.012 | -0.976 | 0.329 |
| ETAY3  | ON |        |       |        |       |
| ETAY2  |    | 0.031  | 0.018 | 1.742  | 0.081 |
| ETAX2  |    | -0.012 | 0.012 | -0.980 | 0.327 |
| ETAY4  | ON |        |       |        |       |
| ETAY3  |    | 0.029  | 0.017 | 1.743  | 0.081 |
| ETAX3  |    | -0.012 | 0.012 | -0.978 | 0.328 |
| ETAY5  | ON |        |       |        |       |
| ETAY4  |    | 0.030  | 0.017 | 1.750  | 0.080 |
| ETAX4  |    | -0.011 | 0.012 | -0.983 | 0.326 |
| ETAY6  | ON |        |       |        |       |
| ETAY5  |    | 0.033  | 0.019 | 1.725  | 0.084 |
| ETAX5  |    | -0.013 | 0.013 | -0.976 | 0.329 |
| ETAY7  | ON |        |       |        |       |
| ETAY6  |    | 0.031  | 0.018 | 1.726  | 0.084 |
| ETAX6  |    | -0.013 | 0.013 | -0.974 | 0.330 |



|         |      |        |       |        |       |
|---------|------|--------|-------|--------|-------|
| ETAY8   | ON   |        |       |        |       |
| ETAY7   |      | 0.032  | 0.018 | 1.757  | 0.079 |
| ETAX7   |      | -0.014 | 0.014 | -0.978 | 0.328 |
| ETAY9   | ON   |        |       |        |       |
| ETAY8   |      | 0.032  | 0.018 | 1.739  | 0.082 |
| ETAX8   |      | -0.015 | 0.015 | -0.976 | 0.329 |
| ETAY10  | ON   |        |       |        |       |
| ETAY9   |      | 0.027  | 0.015 | 1.745  | 0.081 |
| ETAX9   |      | -0.014 | 0.014 | -0.972 | 0.331 |
| ETAY11  | ON   |        |       |        |       |
| ETAY10  |      | 0.031  | 0.018 | 1.749  | 0.080 |
| ETAX10  |      | -0.014 | 0.014 | -0.976 | 0.329 |
| ETAY12  | ON   |        |       |        |       |
| ETAY11  |      | 0.026  | 0.015 | 1.737  | 0.082 |
| ETAX11  |      | -0.012 | 0.012 | -0.976 | 0.329 |
| ETAX1   | WITH |        |       |        |       |
| ETAY1   |      | 0.162  | 0.047 | 3.438  | 0.001 |
| IX      |      | 0.000  | 0.000 | 0.000  | 1.000 |
| SX      |      | 0.000  | 0.000 | 0.000  | 1.000 |
| IY      |      | 0.000  | 0.000 | 0.000  | 1.000 |
| SY      |      | 0.000  | 0.000 | 0.000  | 1.000 |
| GQOL    |      | -0.021 | 0.035 | -0.594 | 0.552 |
| GQOLPRE |      | 0.005  | 0.036 | 0.142  | 0.887 |
| ETAX2   | WITH |        |       |        |       |
| ETAY2   |      | 0.129  | 0.014 | 9.201  | 0.000 |
| ETAX3   | WITH |        |       |        |       |
| ETAY3   |      | 0.133  | 0.014 | 9.815  | 0.000 |
| ETAX4   | WITH |        |       |        |       |
| ETAY4   |      | 0.131  | 0.013 | 9.753  | 0.000 |
| ETAX5   | WITH |        |       |        |       |
| ETAY5   |      | 0.129  | 0.013 | 9.796  | 0.000 |
| ETAX6   | WITH |        |       |        |       |
| ETAY6   |      | 0.149  | 0.015 | 9.754  | 0.000 |
| ETAX7   | WITH |        |       |        |       |
| ETAY7   |      | 0.148  | 0.015 | 9.928  | 0.000 |
| ETAX8   | WITH |        |       |        |       |
| ETAY8   |      | 0.159  | 0.016 | 9.727  | 0.000 |
| ETAX9   | WITH |        |       |        |       |
| ETAY9   |      | 0.160  | 0.017 | 9.630  | 0.000 |
| ETAX10  | WITH |        |       |        |       |

|                       |        |       |        |       |
|-----------------------|--------|-------|--------|-------|
| ETAY10                | 0.144  | 0.015 | 9.682  | 0.000 |
| ETAX11 WITH<br>ETAY11 | 0.151  | 0.015 | 9.791  | 0.000 |
| ETAX12 WITH<br>ETAY12 | 0.119  | 0.013 | 9.526  | 0.000 |
| IX WITH<br>SX         | -0.203 | 0.054 | -3.780 | 0.000 |
| IY                    | 0.489  | 0.028 | 17.639 | 0.000 |
| SY                    | -0.238 | 0.095 | -2.502 | 0.012 |
| GQOLPRE               | 0.067  | 0.036 | 1.859  | 0.063 |
| GQOL                  | 0.093  | 0.036 | 2.559  | 0.010 |
| ETAY1                 | 0.000  | 0.000 | 0.000  | 1.000 |
| SX WITH<br>IY         | -0.127 | 0.056 | -2.263 | 0.024 |
| SY                    | 0.301  | 0.164 | 1.837  | 0.066 |
| GQOLPRE               | 0.011  | 0.064 | 0.173  | 0.863 |
| GQOL                  | -0.027 | 0.065 | -0.406 | 0.684 |
| ETAY1                 | 0.000  | 0.000 | 0.000  | 1.000 |
| IY WITH<br>SY         | -0.562 | 0.114 | -4.907 | 0.000 |
| GQOLPRE               | 0.054  | 0.038 | 1.430  | 0.153 |
| GQOL                  | 0.196  | 0.036 | 5.524  | 0.000 |
| ETAY1                 | 0.000  | 0.000 | 0.000  | 1.000 |
| SY WITH<br>GQOLPRE    | 0.175  | 0.083 | 2.114  | 0.034 |
| GQOL                  | -0.031 | 0.065 | -0.478 | 0.633 |
| ETAY1                 | 0.000  | 0.000 | 0.000  | 1.000 |
| GQOL WITH<br>GQOLPRE  | 0.612  | 0.027 | 22.991 | 0.000 |
| ETAY1 WITH<br>GQOL    | -0.039 | 0.032 | -1.198 | 0.231 |
| GQOLPRE               | 0.056  | 0.039 | 1.447  | 0.148 |
| SALF WITH<br>SALFPRE  | 0.261  | 0.028 | 9.330  | 0.000 |
| SALM WITH<br>SALMPRE  | 0.246  | 0.032 | 7.797  | 0.000 |
| REL P WITH<br>RELPPRE | 0.373  | 0.028 | 13.159 | 0.000 |
| QOL WITH<br>QOLPRE    | 0.133  | 0.042 | 3.171  | 0.002 |
| Means                 |        |       |        |       |

|            |        |       |        |       |
|------------|--------|-------|--------|-------|
| IX         | 2.328  | 0.059 | 39.276 | 0.000 |
| SX         | -0.139 | 0.053 | -2.625 | 0.009 |
| IY         | 1.249  | 0.044 | 28.137 | 0.000 |
| SY         | -0.370 | 0.145 | -2.546 | 0.011 |
| ETAX1      | 0.000  | 0.000 | 0.000  | 1.000 |
| ETAY1      | 0.000  | 0.000 | 0.000  | 1.000 |
| Intercepts |        |       |        |       |
| SALF       | 4.866  | 0.109 | 44.621 | 0.000 |
| SALFPRE    | 3.795  | 0.065 | 58.713 | 0.000 |
| SALM       | 3.248  | 0.062 | 52.601 | 0.000 |
| SALMPRE    | 3.389  | 0.058 | 58.594 | 0.000 |
| RELP       | 3.850  | 0.083 | 46.220 | 0.000 |
| RELPPRE    | 4.048  | 0.075 | 53.818 | 0.000 |
| QOL        | 5.149  | 0.117 | 43.982 | 0.000 |
| QOLPRE     | 4.662  | 0.088 | 52.926 | 0.000 |
| Y1         | 0.000  | 0.000 | 0.000  | 1.000 |
| Y2         | 0.000  | 0.000 | 0.000  | 1.000 |
| Y3         | 0.000  | 0.000 | 0.000  | 1.000 |
| Y4         | 0.000  | 0.000 | 0.000  | 1.000 |
| Y5         | 0.000  | 0.000 | 0.000  | 1.000 |
| Y6         | 0.000  | 0.000 | 0.000  | 1.000 |
| Y7         | 0.000  | 0.000 | 0.000  | 1.000 |
| Y8         | 0.000  | 0.000 | 0.000  | 1.000 |
| Y9         | 0.000  | 0.000 | 0.000  | 1.000 |
| Y10        | 0.000  | 0.000 | 0.000  | 1.000 |
| Y11        | 0.000  | 0.000 | 0.000  | 1.000 |
| Y12        | 0.000  | 0.000 | 0.000  | 1.000 |
| X1         | 0.000  | 0.000 | 0.000  | 1.000 |
| X2         | 0.000  | 0.000 | 0.000  | 1.000 |
| X3         | 0.000  | 0.000 | 0.000  | 1.000 |
| X4         | 0.000  | 0.000 | 0.000  | 1.000 |
| X5         | 0.000  | 0.000 | 0.000  | 1.000 |
| X6         | 0.000  | 0.000 | 0.000  | 1.000 |
| X7         | 0.000  | 0.000 | 0.000  | 1.000 |
| X8         | 0.000  | 0.000 | 0.000  | 1.000 |
| X9         | 0.000  | 0.000 | 0.000  | 1.000 |
| X10        | 0.000  | 0.000 | 0.000  | 1.000 |
| X11        | 0.000  | 0.000 | 0.000  | 1.000 |
| X12        | 0.000  | 0.000 | 0.000  | 1.000 |
| ETAX2      | 0.000  | 0.000 | 0.000  | 1.000 |
| ETAX3      | 0.000  | 0.000 | 0.000  | 1.000 |
| ETAX4      | 0.000  | 0.000 | 0.000  | 1.000 |
| ETAX5      | 0.000  | 0.000 | 0.000  | 1.000 |
| ETAX6      | 0.000  | 0.000 | 0.000  | 1.000 |
| ETAX7      | 0.000  | 0.000 | 0.000  | 1.000 |
| ETAX8      | 0.000  | 0.000 | 0.000  | 1.000 |
| ETAX9      | 0.000  | 0.000 | 0.000  | 1.000 |
| ETAX10     | 0.000  | 0.000 | 0.000  | 1.000 |
| ETAX11     | 0.000  | 0.000 | 0.000  | 1.000 |
| ETAX12     | 0.000  | 0.000 | 0.000  | 1.000 |
| ETAY2      | 0.000  | 0.000 | 0.000  | 1.000 |
| ETAY3      | 0.000  | 0.000 | 0.000  | 1.000 |
| ETAY4      | 0.000  | 0.000 | 0.000  | 1.000 |

|                    |       |       |         |         |
|--------------------|-------|-------|---------|---------|
| ETAY5              | 0.000 | 0.000 | 0.000   | 1.000   |
| ETAY6              | 0.000 | 0.000 | 0.000   | 1.000   |
| ETAY7              | 0.000 | 0.000 | 0.000   | 1.000   |
| ETAY8              | 0.000 | 0.000 | 0.000   | 1.000   |
| ETAY9              | 0.000 | 0.000 | 0.000   | 1.000   |
| ETAY10             | 0.000 | 0.000 | 0.000   | 1.000   |
| ETAY11             | 0.000 | 0.000 | 0.000   | 1.000   |
| ETAY12             | 0.000 | 0.000 | 0.000   | 1.000   |
| Variances          |       |       |         |         |
| GQOL               | 1.000 | 0.000 | 999.000 | 999.000 |
| GQOLPRE            | 1.000 | 0.000 | 999.000 | 999.000 |
| IX                 | 1.000 | 0.000 | 999.000 | 999.000 |
| SX                 | 1.000 | 0.000 | 999.000 | 999.000 |
| IY                 | 1.000 | 0.000 | 999.000 | 999.000 |
| SY                 | 1.000 | 0.000 | 999.000 | 999.000 |
| ETAX1              | 1.000 | 0.000 | 999.000 | 999.000 |
| ETAY1              | 1.000 | 0.000 | 999.000 | 999.000 |
| Residual Variances |       |       |         |         |
| SALF               | 0.781 | 0.026 | 30.048  | 0.000   |
| SALFPRE            | 0.796 | 0.025 | 31.884  | 0.000   |
| SALM               | 0.574 | 0.029 | 19.834  | 0.000   |
| SALMPRE            | 0.521 | 0.033 | 15.923  | 0.000   |
| RELP               | 0.651 | 0.028 | 23.185  | 0.000   |
| RELPPRE            | 0.689 | 0.028 | 24.855  | 0.000   |
| QOL                | 0.403 | 0.032 | 12.708  | 0.000   |
| QOLPRE             | 0.560 | 0.033 | 16.739  | 0.000   |
| Y1                 | 0.000 | 0.000 | 0.000   | 1.000   |
| Y2                 | 0.000 | 0.000 | 0.000   | 1.000   |
| Y3                 | 0.000 | 0.000 | 0.000   | 1.000   |
| Y4                 | 0.000 | 0.000 | 0.000   | 1.000   |
| Y5                 | 0.000 | 0.000 | 0.000   | 1.000   |
| Y6                 | 0.000 | 0.000 | 0.000   | 1.000   |
| Y7                 | 0.000 | 0.000 | 0.000   | 1.000   |
| Y8                 | 0.000 | 0.000 | 0.000   | 1.000   |
| Y9                 | 0.000 | 0.000 | 0.000   | 1.000   |
| Y10                | 0.000 | 0.000 | 0.000   | 1.000   |
| Y11                | 0.000 | 0.000 | 0.000   | 1.000   |
| Y12                | 0.000 | 0.000 | 0.000   | 1.000   |
| X1                 | 0.000 | 0.000 | 0.000   | 1.000   |
| X2                 | 0.000 | 0.000 | 0.000   | 1.000   |
| X3                 | 0.000 | 0.000 | 0.000   | 1.000   |
| X4                 | 0.000 | 0.000 | 0.000   | 1.000   |
| X5                 | 0.000 | 0.000 | 0.000   | 1.000   |
| X6                 | 0.000 | 0.000 | 0.000   | 1.000   |
| X7                 | 0.000 | 0.000 | 0.000   | 1.000   |
| X8                 | 0.000 | 0.000 | 0.000   | 1.000   |
| X9                 | 0.000 | 0.000 | 0.000   | 1.000   |
| X10                | 0.000 | 0.000 | 0.000   | 1.000   |
| X11                | 0.000 | 0.000 | 0.000   | 1.000   |
| X12                | 0.000 | 0.000 | 0.000   | 1.000   |
| ETAX2              | 0.998 | 0.001 | 910.652 | 0.000   |
| ETAX3              | 0.998 | 0.001 | 846.118 | 0.000   |

|        |       |       |          |       |
|--------|-------|-------|----------|-------|
| ETAX4  | 0.998 | 0.001 | 823.803  | 0.000 |
| ETAX5  | 0.998 | 0.001 | 883.145  | 0.000 |
| ETAX6  | 0.998 | 0.001 | 777.009  | 0.000 |
| ETAX7  | 0.998 | 0.001 | 954.046  | 0.000 |
| ETAX8  | 0.998 | 0.001 | 832.044  | 0.000 |
| ETAX9  | 0.999 | 0.001 | 967.383  | 0.000 |
| ETAX10 | 0.998 | 0.001 | 895.534  | 0.000 |
| ETAX11 | 0.998 | 0.001 | 879.413  | 0.000 |
| ETAX12 | 0.999 | 0.001 | 1047.354 | 0.000 |
| ETAY2  | 0.999 | 0.001 | 1151.764 | 0.000 |
| ETAY3  | 0.999 | 0.001 | 865.476  | 0.000 |
| ETAY4  | 0.999 | 0.001 | 981.085  | 0.000 |
| ETAY5  | 0.999 | 0.001 | 910.184  | 0.000 |
| ETAY6  | 0.999 | 0.001 | 736.304  | 0.000 |
| ETAY7  | 0.999 | 0.001 | 830.900  | 0.000 |
| ETAY8  | 0.999 | 0.001 | 825.892  | 0.000 |
| ETAY9  | 0.999 | 0.001 | 792.707  | 0.000 |
| ETAY10 | 0.999 | 0.001 | 1078.473 | 0.000 |
| ETAY11 | 0.999 | 0.001 | 816.969  | 0.000 |
| ETAY12 | 0.999 | 0.001 | 1204.668 | 0.000 |

# R-SQUARE

| Observed<br>Variable | Estimate | S.E.  | Est./S.E. | Two-Tailed<br>P-Value |
|----------------------|----------|-------|-----------|-----------------------|
| SALF                 | 0.219    | 0.026 | 8.427     | 0.000                 |
| SALFPRE              | 0.204    | 0.025 | 8.171     | 0.000                 |
| SALM                 | 0.426    | 0.029 | 14.734    | 0.000                 |
| SALMPRE              | 0.479    | 0.033 | 14.620    | 0.000                 |
| RELP                 | 0.349    | 0.028 | 12.406    | 0.000                 |
| RELPPRE              | 0.311    | 0.028 | 11.239    | 0.000                 |
| QOL                  | 0.597    | 0.032 | 18.794    | 0.000                 |
| QOLPRE               | 0.440    | 0.033 | 13.133    | 0.000                 |
| Y1                   | 1.000    | 0.000 | 999.000   | 999.000               |
| Y2                   | 1.000    | 0.000 | 999.000   | 999.000               |
| Y3                   | 1.000    | 0.000 | 999.000   | 999.000               |
| Y4                   | 1.000    | 0.000 | 999.000   | 999.000               |
| Y5                   | 1.000    | 0.000 | 999.000   | 999.000               |
| Y6                   | 1.000    | 0.000 | 999.000   | 999.000               |
| Y7                   | 1.000    | 0.000 | 999.000   | 999.000               |
| Y8                   | 1.000    | 0.000 | 999.000   | 999.000               |
| Y9                   | 1.000    | 0.000 | 999.000   | 999.000               |
| Y10                  | 1.000    | 0.000 | 999.000   | 999.000               |
| Y11                  | 1.000    | 0.000 | 999.000   | 999.000               |
| Y12                  | 1.000    | 0.000 | 999.000   | 999.000               |
| X1                   | 1.000    | 0.000 | 999.000   | 999.000               |
| X2                   | 1.000    | 0.000 | 999.000   | 999.000               |
| X3                   | 1.000    | 0.000 | 999.000   | 999.000               |
| X4                   | 1.000    | 0.000 | 999.000   | 999.000               |
| X5                   | 1.000    | 0.000 | 999.000   | 999.000               |
| X6                   | 1.000    | 0.000 | 999.000   | 999.000               |
| X7                   | 1.000    | 0.000 | 999.000   | 999.000               |



|     |       |       |       |       |       |       |       |
|-----|-------|-------|-------|-------|-------|-------|-------|
| X5  | 1.000 | 1.000 | 1.000 | 1.000 | 1.000 | 1.000 | 1.000 |
| X6  | 1.000 | 1.000 | 1.000 | 1.000 | 1.000 | 1.000 | 1.000 |
| X7  | 1.000 | 1.000 | 1.000 | 1.000 | 1.000 | 1.000 | 1.000 |
| X8  | 1.000 | 1.000 | 1.000 | 1.000 | 1.000 | 1.000 | 1.000 |
| X9  | 1.000 | 1.000 | 1.000 | 1.000 | 1.000 | 1.000 | 1.000 |
| X10 | 1.000 | 1.000 | 1.000 | 1.000 | 1.000 | 1.000 | 1.000 |
| X11 | 1.000 | 1.000 | 1.000 | 1.000 | 1.000 | 1.000 | 1.000 |
| X12 | 1.000 | 1.000 | 1.000 | 1.000 | 1.000 | 1.000 | 1.000 |

|     |    |        |        |        |        |        |        |
|-----|----|--------|--------|--------|--------|--------|--------|
| SX  | BY |        |        |        |        |        |        |
| X1  |    | 0.000  | 0.000  | 0.000  | 0.000  | 0.000  | 0.000  |
| X2  |    | 1.000  | 1.000  | 1.000  | 1.000  | 1.000  | 1.000  |
| X3  |    | 2.000  | 2.000  | 2.000  | 2.000  | 2.000  | 2.000  |
| X4  |    | 3.000  | 3.000  | 3.000  | 3.000  | 3.000  | 3.000  |
| X5  |    | 4.000  | 4.000  | 4.000  | 4.000  | 4.000  | 4.000  |
| X6  |    | 5.000  | 5.000  | 5.000  | 5.000  | 5.000  | 5.000  |
| X7  |    | 6.000  | 6.000  | 6.000  | 6.000  | 6.000  | 6.000  |
| X8  |    | 7.000  | 7.000  | 7.000  | 7.000  | 7.000  | 7.000  |
| X9  |    | 8.000  | 8.000  | 8.000  | 8.000  | 8.000  | 8.000  |
| X10 |    | 9.000  | 9.000  | 9.000  | 9.000  | 9.000  | 9.000  |
| X11 |    | 10.000 | 10.000 | 10.000 | 10.000 | 10.000 | 10.000 |
| X12 |    | 11.000 | 11.000 | 11.000 | 11.000 | 11.000 | 11.000 |

|     |    |       |       |       |       |       |       |
|-----|----|-------|-------|-------|-------|-------|-------|
| IY  | BY |       |       |       |       |       |       |
| Y1  |    | 1.000 | 1.000 | 1.000 | 1.000 | 1.000 | 1.000 |
| Y2  |    | 1.000 | 1.000 | 1.000 | 1.000 | 1.000 | 1.000 |
| Y3  |    | 1.000 | 1.000 | 1.000 | 1.000 | 1.000 | 1.000 |
| Y4  |    | 1.000 | 1.000 | 1.000 | 1.000 | 1.000 | 1.000 |
| Y5  |    | 1.000 | 1.000 | 1.000 | 1.000 | 1.000 | 1.000 |
| Y6  |    | 1.000 | 1.000 | 1.000 | 1.000 | 1.000 | 1.000 |
| Y7  |    | 1.000 | 1.000 | 1.000 | 1.000 | 1.000 | 1.000 |
| Y8  |    | 1.000 | 1.000 | 1.000 | 1.000 | 1.000 | 1.000 |
| Y9  |    | 1.000 | 1.000 | 1.000 | 1.000 | 1.000 | 1.000 |
| Y10 |    | 1.000 | 1.000 | 1.000 | 1.000 | 1.000 | 1.000 |
| Y11 |    | 1.000 | 1.000 | 1.000 | 1.000 | 1.000 | 1.000 |
| Y12 |    | 1.000 | 1.000 | 1.000 | 1.000 | 1.000 | 1.000 |

|     |    |        |        |        |        |        |        |
|-----|----|--------|--------|--------|--------|--------|--------|
| SY  | BY |        |        |        |        |        |        |
| Y1  |    | 0.000  | 0.000  | 0.000  | 0.000  | 0.000  | 0.000  |
| Y2  |    | 1.000  | 1.000  | 1.000  | 1.000  | 1.000  | 1.000  |
| Y3  |    | 2.000  | 2.000  | 2.000  | 2.000  | 2.000  | 2.000  |
| Y4  |    | 3.000  | 3.000  | 3.000  | 3.000  | 3.000  | 3.000  |
| Y5  |    | 4.000  | 4.000  | 4.000  | 4.000  | 4.000  | 4.000  |
| Y6  |    | 5.000  | 5.000  | 5.000  | 5.000  | 5.000  | 5.000  |
| Y7  |    | 6.000  | 6.000  | 6.000  | 6.000  | 6.000  | 6.000  |
| Y8  |    | 7.000  | 7.000  | 7.000  | 7.000  | 7.000  | 7.000  |
| Y9  |    | 8.000  | 8.000  | 8.000  | 8.000  | 8.000  | 8.000  |
| Y10 |    | 9.000  | 9.000  | 9.000  | 9.000  | 9.000  | 9.000  |
| Y11 |    | 10.000 | 10.000 | 10.000 | 10.000 | 10.000 | 10.000 |
| Y12 |    | 11.000 | 11.000 | 11.000 | 11.000 | 11.000 | 11.000 |

|       |    |       |       |       |       |       |       |
|-------|----|-------|-------|-------|-------|-------|-------|
| ETAX1 | BY |       |       |       |       |       |       |
| X1    |    | 1.000 | 1.000 | 1.000 | 1.000 | 1.000 | 1.000 |





|        |    |        |        |        |       |       |       |       |
|--------|----|--------|--------|--------|-------|-------|-------|-------|
| ETAY8  | BY | 1.000  | 1.000  | 1.000  | 1.000 | 1.000 | 1.000 | 1.000 |
| Y8     |    |        |        |        |       |       |       |       |
| ETAY9  | BY | 1.000  | 1.000  | 1.000  | 1.000 | 1.000 | 1.000 | 1.000 |
| Y9     |    |        |        |        |       |       |       |       |
| ETAY10 | BY | 1.000  | 1.000  | 1.000  | 1.000 | 1.000 | 1.000 | 1.000 |
| Y10    |    |        |        |        |       |       |       |       |
| ETAY11 | BY | 1.000  | 1.000  | 1.000  | 1.000 | 1.000 | 1.000 | 1.000 |
| Y11    |    |        |        |        |       |       |       |       |
| ETAY12 | BY | 1.000  | 1.000  | 1.000  | 1.000 | 1.000 | 1.000 | 1.000 |
| Y12    |    |        |        |        |       |       |       |       |
| ETAX2  | ON | 0.003  | 0.011  | 0.015  | 0.036 | 0.059 | 0.064 | 0.073 |
| ETAX1  |    | -0.042 | -0.026 | -0.017 | 0.030 | 0.074 | 0.084 | 0.098 |
| ETAY1  |    |        |        |        |       |       |       |       |
| ETAX3  | ON | 0.003  | 0.011  | 0.015  | 0.036 | 0.059 | 0.064 | 0.073 |
| ETAX2  |    | -0.042 | -0.026 | -0.017 | 0.030 | 0.074 | 0.084 | 0.098 |
| ETAY2  |    |        |        |        |       |       |       |       |
| ETAX4  | ON | 0.003  | 0.011  | 0.015  | 0.036 | 0.059 | 0.064 | 0.073 |
| ETAX3  |    | -0.042 | -0.026 | -0.017 | 0.030 | 0.074 | 0.084 | 0.098 |
| ETAY3  |    |        |        |        |       |       |       |       |
| ETAX5  | ON | 0.003  | 0.011  | 0.015  | 0.036 | 0.059 | 0.064 | 0.073 |
| ETAX4  |    | -0.042 | -0.026 | -0.017 | 0.030 | 0.074 | 0.084 | 0.098 |
| ETAY4  |    |        |        |        |       |       |       |       |
| ETAX6  | ON | 0.003  | 0.011  | 0.015  | 0.036 | 0.059 | 0.064 | 0.073 |
| ETAX5  |    | -0.042 | -0.026 | -0.017 | 0.030 | 0.074 | 0.084 | 0.098 |
| ETAY5  |    |        |        |        |       |       |       |       |
| ETAX7  | ON | 0.003  | 0.011  | 0.015  | 0.036 | 0.059 | 0.064 | 0.073 |
| ETAX6  |    | -0.042 | -0.026 | -0.017 | 0.030 | 0.074 | 0.084 | 0.098 |
| ETAY6  |    |        |        |        |       |       |       |       |
| ETAX8  | ON | 0.003  | 0.011  | 0.015  | 0.036 | 0.059 | 0.064 | 0.073 |
| ETAX7  |    | -0.042 | -0.026 | -0.017 | 0.030 | 0.074 | 0.084 | 0.098 |
| ETAY7  |    |        |        |        |       |       |       |       |
| ETAX9  | ON | 0.003  | 0.011  | 0.015  | 0.036 | 0.059 | 0.064 | 0.073 |
| ETAX8  |    | -0.042 | -0.026 | -0.017 | 0.030 | 0.074 | 0.084 | 0.098 |
| ETAY8  |    |        |        |        |       |       |       |       |
| ETAX10 | ON | 0.003  | 0.011  | 0.015  | 0.036 | 0.059 | 0.064 | 0.073 |
| ETAX9  |    | -0.042 | -0.026 | -0.017 | 0.030 | 0.074 | 0.084 | 0.098 |
| ETAY9  |    |        |        |        |       |       |       |       |
| ETAX11 | ON | 0.003  | 0.011  | 0.015  | 0.036 | 0.059 | 0.064 | 0.073 |
| ETAX10 |    | -0.042 | -0.026 | -0.017 | 0.030 | 0.074 | 0.084 | 0.098 |
| ETAY10 |    |        |        |        |       |       |       |       |



|                       |         |         |         |         |         |         |         |
|-----------------------|---------|---------|---------|---------|---------|---------|---------|
| SY                    | 0.000   | 0.000   | 0.000   | 0.000   | 0.000   | 0.000   | 0.000   |
| GQOL                  | -0.994  | -0.800  | -0.704  | -0.186  | 0.316   | 0.411   | 0.577   |
| GQOLPRE               | -0.741  | -0.556  | -0.449  | 0.046   | 0.614   | 0.733   | 0.935   |
| ETAX2 WITH<br>ETAY2   | 27.301  | 28.908  | 30.181  | 35.984  | 41.708  | 42.453  | 44.561  |
| ETAX3 WITH<br>ETAY3   | 27.301  | 28.908  | 30.181  | 35.984  | 41.708  | 42.453  | 44.561  |
| ETAX4 WITH<br>ETAY4   | 27.301  | 28.908  | 30.181  | 35.984  | 41.708  | 42.453  | 44.561  |
| ETAX5 WITH<br>ETAY5   | 27.301  | 28.908  | 30.181  | 35.984  | 41.708  | 42.453  | 44.561  |
| ETAX6 WITH<br>ETAY6   | 27.301  | 28.908  | 30.181  | 35.984  | 41.708  | 42.453  | 44.561  |
| ETAX7 WITH<br>ETAY7   | 27.301  | 28.908  | 30.181  | 35.984  | 41.708  | 42.453  | 44.561  |
| ETAX8 WITH<br>ETAY8   | 27.301  | 28.908  | 30.181  | 35.984  | 41.708  | 42.453  | 44.561  |
| ETAX9 WITH<br>ETAY9   | 27.301  | 28.908  | 30.181  | 35.984  | 41.708  | 42.453  | 44.561  |
| ETAX10 WITH<br>ETAY10 | 27.301  | 28.908  | 30.181  | 35.984  | 41.708  | 42.453  | 44.561  |
| ETAX11 WITH<br>ETAY11 | 27.301  | 28.908  | 30.181  | 35.984  | 41.708  | 42.453  | 44.561  |
| ETAX12 WITH<br>ETAY12 | 27.301  | 28.908  | 30.181  | 35.984  | 41.708  | 42.453  | 44.561  |
| IX WITH<br>SX         | -12.774 | -10.688 | -10.013 | -6.465  | -2.740  | -2.102  | -1.042  |
| IY                    | 99.115  | 104.090 | 106.838 | 122.197 | 137.292 | 140.256 | 146.422 |
| SY                    | -5.124  | -4.737  | -4.463  | -2.976  | -1.561  | -1.220  | -0.556  |
| GQOLPRE               | -0.252  | -0.028  | 0.052   | 0.604   | 1.147   | 1.244   | 1.486   |
| GQOL                  | 0.021   | 0.238   | 0.328   | 0.810   | 1.401   | 1.483   | 1.711   |
| ETAY1                 | 0.000   | 0.000   | 0.000   | 0.000   | 0.000   | 0.000   | 0.000   |
| SX WITH<br>IY         | -3.864  | -3.459  | -3.171  | -1.792  | -0.494  | -0.223  | 0.167   |
| SY                    | -0.028  | 0.026   | 0.047   | 0.212   | 0.391   | 0.427   | 0.481   |
| GQOLPRE               | -0.071  | -0.057  | -0.046  | 0.006   | 0.058   | 0.068   | 0.087   |
| GQOL                  | -0.092  | -0.073  | -0.063  | -0.013  | 0.041   | 0.053   | 0.069   |
| ETAY1                 | 0.000   | 0.000   | 0.000   | 0.000   | 0.000   | 0.000   | 0.000   |
| IY WITH<br>SY         | -5.154  | -4.650  | -4.400  | -3.112  | -1.870  | -1.630  | -1.196  |



|                    |         |         |         |         |         |         |         |
|--------------------|---------|---------|---------|---------|---------|---------|---------|
| Y10                | 0.000   | 0.000   | 0.000   | 0.000   | 0.000   | 0.000   | 0.000   |
| Y11                | 0.000   | 0.000   | 0.000   | 0.000   | 0.000   | 0.000   | 0.000   |
| Y12                | 0.000   | 0.000   | 0.000   | 0.000   | 0.000   | 0.000   | 0.000   |
| X1                 | 0.000   | 0.000   | 0.000   | 0.000   | 0.000   | 0.000   | 0.000   |
| X2                 | 0.000   | 0.000   | 0.000   | 0.000   | 0.000   | 0.000   | 0.000   |
| X3                 | 0.000   | 0.000   | 0.000   | 0.000   | 0.000   | 0.000   | 0.000   |
| X4                 | 0.000   | 0.000   | 0.000   | 0.000   | 0.000   | 0.000   | 0.000   |
| X5                 | 0.000   | 0.000   | 0.000   | 0.000   | 0.000   | 0.000   | 0.000   |
| X6                 | 0.000   | 0.000   | 0.000   | 0.000   | 0.000   | 0.000   | 0.000   |
| X7                 | 0.000   | 0.000   | 0.000   | 0.000   | 0.000   | 0.000   | 0.000   |
| X8                 | 0.000   | 0.000   | 0.000   | 0.000   | 0.000   | 0.000   | 0.000   |
| X9                 | 0.000   | 0.000   | 0.000   | 0.000   | 0.000   | 0.000   | 0.000   |
| X10                | 0.000   | 0.000   | 0.000   | 0.000   | 0.000   | 0.000   | 0.000   |
| X11                | 0.000   | 0.000   | 0.000   | 0.000   | 0.000   | 0.000   | 0.000   |
| X12                | 0.000   | 0.000   | 0.000   | 0.000   | 0.000   | 0.000   | 0.000   |
| ETAX2              | 0.000   | 0.000   | 0.000   | 0.000   | 0.000   | 0.000   | 0.000   |
| ETAX3              | 0.000   | 0.000   | 0.000   | 0.000   | 0.000   | 0.000   | 0.000   |
| ETAX4              | 0.000   | 0.000   | 0.000   | 0.000   | 0.000   | 0.000   | 0.000   |
| ETAX5              | 0.000   | 0.000   | 0.000   | 0.000   | 0.000   | 0.000   | 0.000   |
| ETAX6              | 0.000   | 0.000   | 0.000   | 0.000   | 0.000   | 0.000   | 0.000   |
| ETAX7              | 0.000   | 0.000   | 0.000   | 0.000   | 0.000   | 0.000   | 0.000   |
| ETAX8              | 0.000   | 0.000   | 0.000   | 0.000   | 0.000   | 0.000   | 0.000   |
| ETAX9              | 0.000   | 0.000   | 0.000   | 0.000   | 0.000   | 0.000   | 0.000   |
| ETAX10             | 0.000   | 0.000   | 0.000   | 0.000   | 0.000   | 0.000   | 0.000   |
| ETAX11             | 0.000   | 0.000   | 0.000   | 0.000   | 0.000   | 0.000   | 0.000   |
| ETAX12             | 0.000   | 0.000   | 0.000   | 0.000   | 0.000   | 0.000   | 0.000   |
| ETAY2              | 0.000   | 0.000   | 0.000   | 0.000   | 0.000   | 0.000   | 0.000   |
| ETAY3              | 0.000   | 0.000   | 0.000   | 0.000   | 0.000   | 0.000   | 0.000   |
| ETAY4              | 0.000   | 0.000   | 0.000   | 0.000   | 0.000   | 0.000   | 0.000   |
| ETAY5              | 0.000   | 0.000   | 0.000   | 0.000   | 0.000   | 0.000   | 0.000   |
| ETAY6              | 0.000   | 0.000   | 0.000   | 0.000   | 0.000   | 0.000   | 0.000   |
| ETAY7              | 0.000   | 0.000   | 0.000   | 0.000   | 0.000   | 0.000   | 0.000   |
| ETAY8              | 0.000   | 0.000   | 0.000   | 0.000   | 0.000   | 0.000   | 0.000   |
| ETAY9              | 0.000   | 0.000   | 0.000   | 0.000   | 0.000   | 0.000   | 0.000   |
| ETAY10             | 0.000   | 0.000   | 0.000   | 0.000   | 0.000   | 0.000   | 0.000   |
| ETAY11             | 0.000   | 0.000   | 0.000   | 0.000   | 0.000   | 0.000   | 0.000   |
| ETAY12             | 0.000   | 0.000   | 0.000   | 0.000   | 0.000   | 0.000   | 0.000   |
| Variances          |         |         |         |         |         |         |         |
| GQOL               | 0.093   | 0.102   | 0.107   | 0.134   | 0.161   | 0.169   | 0.183   |
| GQOLPRE            | 0.098   | 0.107   | 0.114   | 0.142   | 0.174   | 0.181   | 0.196   |
| IX                 | 507.485 | 519.918 | 526.755 | 564.798 | 600.666 | 607.670 | 626.113 |
| SX                 | 0.876   | 1.160   | 1.263   | 1.789   | 2.345   | 2.439   | 2.680   |
| IY                 | 80.610  | 90.552  | 94.558  | 110.767 | 127.204 | 130.213 | 136.630 |
| SY                 | 0.086   | 0.126   | 0.151   | 0.277   | 0.414   | 0.437   | 0.477   |
| ETAX1              | 494.989 | 517.570 | 526.236 | 577.868 | 630.296 | 641.943 | 656.647 |
| ETAY1              | 79.501  | 83.543  | 86.913  | 101.381 | 120.457 | 124.026 | 134.811 |
| Residual Variances |         |         |         |         |         |         |         |
| SALF               | 0.419   | 0.434   | 0.440   | 0.478   | 0.519   | 0.528   | 0.547   |
| SALFPRE            | 0.493   | 0.507   | 0.517   | 0.554   | 0.592   | 0.602   | 0.619   |
| SALM               | 0.475   | 0.494   | 0.503   | 0.555   | 0.604   | 0.613   | 0.633   |
| SALMPRE            | 0.402   | 0.425   | 0.434   | 0.481   | 0.537   | 0.549   | 0.572   |
| RELP               | 0.515   | 0.532   | 0.539   | 0.592   | 0.642   | 0.652   | 0.665   |

|         |         |         |         |         |         |         |         |
|---------|---------|---------|---------|---------|---------|---------|---------|
| RELPPRE | 0.438   | 0.450   | 0.456   | 0.489   | 0.525   | 0.531   | 0.541   |
| QOL     | 0.181   | 0.194   | 0.199   | 0.227   | 0.254   | 0.260   | 0.266   |
| QOLPRE  | 0.250   | 0.262   | 0.267   | 0.298   | 0.332   | 0.336   | 0.345   |
| Y1      | 0.000   | 0.000   | 0.000   | 0.000   | 0.000   | 0.000   | 0.000   |
| Y2      | 0.000   | 0.000   | 0.000   | 0.000   | 0.000   | 0.000   | 0.000   |
| Y3      | 0.000   | 0.000   | 0.000   | 0.000   | 0.000   | 0.000   | 0.000   |
| Y4      | 0.000   | 0.000   | 0.000   | 0.000   | 0.000   | 0.000   | 0.000   |
| Y5      | 0.000   | 0.000   | 0.000   | 0.000   | 0.000   | 0.000   | 0.000   |
| Y6      | 0.000   | 0.000   | 0.000   | 0.000   | 0.000   | 0.000   | 0.000   |
| Y7      | 0.000   | 0.000   | 0.000   | 0.000   | 0.000   | 0.000   | 0.000   |
| Y8      | 0.000   | 0.000   | 0.000   | 0.000   | 0.000   | 0.000   | 0.000   |
| Y9      | 0.000   | 0.000   | 0.000   | 0.000   | 0.000   | 0.000   | 0.000   |
| Y10     | 0.000   | 0.000   | 0.000   | 0.000   | 0.000   | 0.000   | 0.000   |
| Y11     | 0.000   | 0.000   | 0.000   | 0.000   | 0.000   | 0.000   | 0.000   |
| Y12     | 0.000   | 0.000   | 0.000   | 0.000   | 0.000   | 0.000   | 0.000   |
| X1      | 0.000   | 0.000   | 0.000   | 0.000   | 0.000   | 0.000   | 0.000   |
| X2      | 0.000   | 0.000   | 0.000   | 0.000   | 0.000   | 0.000   | 0.000   |
| X3      | 0.000   | 0.000   | 0.000   | 0.000   | 0.000   | 0.000   | 0.000   |
| X4      | 0.000   | 0.000   | 0.000   | 0.000   | 0.000   | 0.000   | 0.000   |
| X5      | 0.000   | 0.000   | 0.000   | 0.000   | 0.000   | 0.000   | 0.000   |
| X6      | 0.000   | 0.000   | 0.000   | 0.000   | 0.000   | 0.000   | 0.000   |
| X7      | 0.000   | 0.000   | 0.000   | 0.000   | 0.000   | 0.000   | 0.000   |
| X8      | 0.000   | 0.000   | 0.000   | 0.000   | 0.000   | 0.000   | 0.000   |
| X9      | 0.000   | 0.000   | 0.000   | 0.000   | 0.000   | 0.000   | 0.000   |
| X10     | 0.000   | 0.000   | 0.000   | 0.000   | 0.000   | 0.000   | 0.000   |
| X11     | 0.000   | 0.000   | 0.000   | 0.000   | 0.000   | 0.000   | 0.000   |
| X12     | 0.000   | 0.000   | 0.000   | 0.000   | 0.000   | 0.000   | 0.000   |
| ETAX2   | 523.179 | 542.344 | 551.596 | 607.205 | 655.533 | 664.480 | 682.265 |
| ETAX3   | 517.932 | 537.274 | 545.657 | 591.736 | 639.161 | 648.364 | 673.060 |
| ETAX4   | 493.501 | 517.024 | 524.957 | 565.474 | 609.188 | 617.442 | 630.989 |
| ETAX5   | 528.507 | 542.604 | 552.215 | 596.660 | 645.634 | 651.409 | 670.576 |
| ETAX6   | 490.921 | 508.194 | 515.435 | 551.991 | 596.365 | 605.865 | 619.687 |
| ETAX7   | 527.278 | 549.444 | 559.198 | 598.718 | 645.409 | 655.956 | 668.376 |
| ETAX8   | 512.321 | 527.128 | 535.660 | 573.717 | 617.632 | 625.667 | 641.513 |
| ETAX9   | 549.470 | 570.137 | 580.227 | 624.638 | 675.597 | 684.432 | 699.403 |
| ETAX10  | 545.876 | 559.974 | 569.335 | 615.176 | 663.386 | 671.997 | 687.512 |
| ETAX11  | 537.471 | 554.371 | 562.214 | 612.222 | 665.653 | 673.137 | 690.755 |
| ETAX12  | 631.910 | 653.578 | 663.875 | 719.858 | 777.911 | 794.064 | 813.688 |
| ETAY2   | 100.525 | 106.322 | 109.561 | 129.041 | 150.163 | 155.179 | 162.818 |
| ETAY3   | 98.898  | 103.063 | 106.624 | 123.704 | 142.392 | 145.840 | 153.258 |
| ETAY4   | 100.439 | 111.058 | 113.897 | 132.579 | 152.234 | 156.706 | 166.458 |
| ETAY5   | 102.275 | 108.935 | 113.007 | 129.655 | 147.985 | 152.092 | 162.211 |
| ETAY6   | 85.803  | 89.093  | 91.834  | 106.030 | 120.107 | 123.207 | 126.671 |
| ETAY7   | 78.686  | 84.174  | 87.033  | 99.172  | 114.983 | 117.111 | 122.967 |
| ETAY8   | 71.643  | 76.245  | 78.236  | 89.085  | 102.328 | 104.594 | 110.936 |
| ETAY9   | 64.808  | 68.041  | 69.904  | 80.545  | 92.937  | 95.575  | 98.888  |
| ETAY10  | 79.827  | 84.976  | 87.664  | 100.910 | 115.555 | 117.871 | 122.540 |
| ETAY11  | 75.164  | 77.697  | 80.591  | 92.295  | 106.777 | 109.371 | 117.922 |
| ETAY12  | 97.905  | 105.682 | 109.657 | 126.338 | 145.967 | 148.775 | 153.629 |

CONFIDENCE INTERVALS OF STANDARDIZED MODEL RESULTS

## STDYX Standardization

|         |         | Lower .5% | Lower 2.5% | Lower 5% | Estimate | Upper 5% | Upper 2.5% | Upper .5% |
|---------|---------|-----------|------------|----------|----------|----------|------------|-----------|
| GQOL    | BY      |           |            |          |          |          |            |           |
|         | SALF    | 0.391     | 0.410      | 0.418    | 0.468    | 0.509    | 0.518      | 0.543     |
|         | SALM    | 0.597     | 0.610      | 0.617    | 0.653    | 0.691    | 0.696      | 0.710     |
|         | RELP    | 0.523     | 0.546      | 0.552    | 0.590    | 0.629    | 0.636      | 0.649     |
|         | QOL     | 0.721     | 0.732      | 0.737    | 0.772    | 0.807    | 0.811      | 0.824     |
| GQOLPRE | BY      |           |            |          |          |          |            |           |
|         | SALFPRE | 0.380     | 0.397      | 0.407    | 0.452    | 0.499    | 0.510      | 0.528     |
|         | SALMPRE | 0.618     | 0.641      | 0.651    | 0.692    | 0.728    | 0.735      | 0.744     |
|         | RELPPRE | 0.481     | 0.509      | 0.516    | 0.558    | 0.597    | 0.606      | 0.619     |
|         | QOLPRE  | 0.593     | 0.612      | 0.620    | 0.663    | 0.703    | 0.710      | 0.723     |
| IX      | BY      |           |            |          |          |          |            |           |
|         | X1      | 0.663     | 0.673      | 0.680    | 0.703    | 0.725    | 0.729      | 0.738     |
|         | X2      | 0.662     | 0.672      | 0.676    | 0.697    | 0.724    | 0.727      | 0.738     |
|         | X3      | 0.667     | 0.676      | 0.681    | 0.704    | 0.727    | 0.732      | 0.741     |
|         | X4      | 0.677     | 0.685      | 0.689    | 0.714    | 0.737    | 0.743      | 0.751     |
|         | X5      | 0.667     | 0.676      | 0.680    | 0.704    | 0.728    | 0.733      | 0.739     |
|         | X6      | 0.680     | 0.688      | 0.692    | 0.717    | 0.740    | 0.745      | 0.755     |
|         | X7      | 0.663     | 0.671      | 0.675    | 0.700    | 0.725    | 0.730      | 0.740     |
|         | X8      | 0.669     | 0.678      | 0.682    | 0.705    | 0.730    | 0.735      | 0.743     |
|         | X9      | 0.647     | 0.658      | 0.662    | 0.686    | 0.709    | 0.715      | 0.723     |
|         | X10     | 0.647     | 0.656      | 0.659    | 0.683    | 0.708    | 0.713      | 0.725     |
|         | X11     | 0.638     | 0.644      | 0.651    | 0.678    | 0.703    | 0.707      | 0.718     |
|         | X12     | 0.607     | 0.616      | 0.621    | 0.644    | 0.670    | 0.674      | 0.680     |
| SX      | BY      |           |            |          |          |          |            |           |
|         | X1      | 0.000     | 0.000      | 0.000    | 0.000    | 0.000    | 0.000      | 0.000     |
|         | X2      | 0.028     | 0.031      | 0.033    | 0.039    | 0.045    | 0.046      | 0.048     |
|         | X3      | 0.052     | 0.063      | 0.065    | 0.079    | 0.090    | 0.093      | 0.097     |
|         | X4      | 0.079     | 0.095      | 0.100    | 0.121    | 0.138    | 0.141      | 0.146     |
|         | X5      | 0.105     | 0.126      | 0.132    | 0.158    | 0.181    | 0.186      | 0.192     |
|         | X6      | 0.143     | 0.162      | 0.169    | 0.202    | 0.232    | 0.238      | 0.248     |
|         | X7      | 0.155     | 0.189      | 0.197    | 0.237    | 0.272    | 0.278      | 0.291     |
|         | X8      | 0.199     | 0.221      | 0.232    | 0.278    | 0.317    | 0.325      | 0.343     |
|         | X9      | 0.220     | 0.249      | 0.261    | 0.309    | 0.356    | 0.364      | 0.381     |
|         | X10     | 0.240     | 0.276      | 0.288    | 0.346    | 0.397    | 0.408      | 0.425     |
|         | X11     | 0.263     | 0.306      | 0.318    | 0.382    | 0.437    | 0.449      | 0.472     |
|         | X12     | 0.264     | 0.312      | 0.331    | 0.399    | 0.457    | 0.465      | 0.482     |
| IY      | BY      |           |            |          |          |          |            |           |
|         | Y1      | 0.650     | 0.669      | 0.683    | 0.723    | 0.753    | 0.758      | 0.769     |
|         | Y2      | 0.613     | 0.633      | 0.640    | 0.688    | 0.726    | 0.732      | 0.748     |
|         | Y3      | 0.632     | 0.652      | 0.659    | 0.704    | 0.743    | 0.752      | 0.762     |
|         | Y4      | 0.623     | 0.644      | 0.656    | 0.698    | 0.745    | 0.752      | 0.768     |
|         | Y5      | 0.639     | 0.652      | 0.664    | 0.709    | 0.756    | 0.765      | 0.779     |
|         | Y6      | 0.677     | 0.703      | 0.711    | 0.758    | 0.807    | 0.817      | 0.836     |
|         | Y7      | 0.692     | 0.716      | 0.728    | 0.779    | 0.831    | 0.839      | 0.863     |
|         | Y8      | 0.714     | 0.737      | 0.750    | 0.807    | 0.864    | 0.875      | 0.904     |
|         | Y9      | 0.728     | 0.762      | 0.773    | 0.834    | 0.895    | 0.913      | 0.934     |

|     |       |       |       |       |       |       |       |
|-----|-------|-------|-------|-------|-------|-------|-------|
| Y10 | 0.694 | 0.717 | 0.729 | 0.788 | 0.849 | 0.863 | 0.883 |
| Y11 | 0.707 | 0.737 | 0.748 | 0.810 | 0.874 | 0.889 | 0.919 |
| Y12 | 0.634 | 0.669 | 0.683 | 0.740 | 0.802 | 0.816 | 0.848 |

|     |    |       |       |       |       |       |       |
|-----|----|-------|-------|-------|-------|-------|-------|
| SY  | BY |       |       |       |       |       |       |
| Y1  |    | 0.000 | 0.000 | 0.000 | 0.000 | 0.000 | 0.000 |
| Y2  |    | 0.019 | 0.023 | 0.025 | 0.034 | 0.042 | 0.044 |
| Y3  |    | 0.040 | 0.047 | 0.052 | 0.070 | 0.085 | 0.092 |
| Y4  |    | 0.060 | 0.069 | 0.077 | 0.105 | 0.127 | 0.137 |
| Y5  |    | 0.079 | 0.094 | 0.104 | 0.142 | 0.173 | 0.184 |
| Y6  |    | 0.107 | 0.127 | 0.139 | 0.190 | 0.231 | 0.247 |
| Y7  |    | 0.133 | 0.157 | 0.171 | 0.234 | 0.283 | 0.301 |
| Y8  |    | 0.158 | 0.190 | 0.205 | 0.283 | 0.346 | 0.371 |
| Y9  |    | 0.179 | 0.220 | 0.241 | 0.334 | 0.404 | 0.440 |
| Y10 |    | 0.201 | 0.236 | 0.257 | 0.355 | 0.432 | 0.469 |
| Y11 |    | 0.225 | 0.274 | 0.299 | 0.405 | 0.493 | 0.527 |
| Y12 |    | 0.229 | 0.271 | 0.295 | 0.407 | 0.496 | 0.531 |

|       |    |       |       |       |       |       |       |
|-------|----|-------|-------|-------|-------|-------|-------|
| ETAX1 | BY |       |       |       |       |       |       |
| X1    |    | 0.675 | 0.684 | 0.688 | 0.711 | 0.733 | 0.737 |

|       |    |       |       |       |       |       |       |
|-------|----|-------|-------|-------|-------|-------|-------|
| ETAX2 | BY |       |       |       |       |       |       |
| X2    |    | 0.684 | 0.696 | 0.700 | 0.723 | 0.741 | 0.745 |

|       |    |       |       |       |       |       |       |
|-------|----|-------|-------|-------|-------|-------|-------|
| ETAX3 | BY |       |       |       |       |       |       |
| X3    |    | 0.692 | 0.699 | 0.702 | 0.721 | 0.740 | 0.743 |

|       |    |       |       |       |       |       |       |
|-------|----|-------|-------|-------|-------|-------|-------|
| ETAX4 | BY |       |       |       |       |       |       |
| X4    |    | 0.685 | 0.692 | 0.696 | 0.715 | 0.732 | 0.734 |

|       |    |       |       |       |       |       |       |
|-------|----|-------|-------|-------|-------|-------|-------|
| ETAX5 | BY |       |       |       |       |       |       |
| X5    |    | 0.696 | 0.704 | 0.707 | 0.724 | 0.741 | 0.745 |

|       |    |       |       |       |       |       |       |
|-------|----|-------|-------|-------|-------|-------|-------|
| ETAX6 | BY |       |       |       |       |       |       |
| X6    |    | 0.683 | 0.690 | 0.693 | 0.710 | 0.727 | 0.731 |

|       |    |       |       |       |       |       |       |
|-------|----|-------|-------|-------|-------|-------|-------|
| ETAX7 | BY |       |       |       |       |       |       |
| X7    |    | 0.694 | 0.701 | 0.705 | 0.722 | 0.738 | 0.741 |

|       |    |       |       |       |       |       |       |
|-------|----|-------|-------|-------|-------|-------|-------|
| ETAX8 | BY |       |       |       |       |       |       |
| X8    |    | 0.684 | 0.692 | 0.696 | 0.711 | 0.729 | 0.732 |

|       |    |       |       |       |       |       |       |
|-------|----|-------|-------|-------|-------|-------|-------|
| ETAX9 | BY |       |       |       |       |       |       |
| X9    |    | 0.692 | 0.700 | 0.704 | 0.722 | 0.740 | 0.743 |

|        |    |       |       |       |       |       |       |
|--------|----|-------|-------|-------|-------|-------|-------|
| ETAX10 | BY |       |       |       |       |       |       |
| X10    |    | 0.686 | 0.693 | 0.696 | 0.714 | 0.734 | 0.736 |

|        |    |       |       |       |       |       |       |
|--------|----|-------|-------|-------|-------|-------|-------|
| ETAX11 | BY |       |       |       |       |       |       |
| X11    |    | 0.675 | 0.684 | 0.687 | 0.707 | 0.730 | 0.732 |

|        |    |       |       |       |       |       |       |
|--------|----|-------|-------|-------|-------|-------|-------|
| ETAX12 | BY |       |       |       |       |       |       |
| X12    |    | 0.695 | 0.703 | 0.707 | 0.728 | 0.749 | 0.752 |



|        |    |        |        |        |       |       |       |       |
|--------|----|--------|--------|--------|-------|-------|-------|-------|
| ETAY1  | BY |        |        |        |       |       |       |       |
| Y1     |    | 0.632  | 0.652  | 0.657  | 0.691 | 0.730 | 0.742 | 0.752 |
| ETAY2  | BY |        |        |        |       |       |       |       |
| Y2     |    | 0.691  | 0.705  | 0.710  | 0.743 | 0.779 | 0.784 | 0.796 |
| ETAY3  | BY |        |        |        |       |       |       |       |
| Y3     |    | 0.689  | 0.709  | 0.715  | 0.745 | 0.776 | 0.783 | 0.793 |
| ETAY4  | BY |        |        |        |       |       |       |       |
| Y4     |    | 0.712  | 0.728  | 0.733  | 0.764 | 0.792 | 0.796 | 0.811 |
| ETAY5  | BY |        |        |        |       |       |       |       |
| Y5     |    | 0.725  | 0.734  | 0.739  | 0.768 | 0.793 | 0.798 | 0.808 |
| ETAY6  | BY |        |        |        |       |       |       |       |
| Y6     |    | 0.703  | 0.710  | 0.715  | 0.742 | 0.768 | 0.774 | 0.781 |
| ETAY7  | BY |        |        |        |       |       |       |       |
| Y7     |    | 0.696  | 0.707  | 0.712  | 0.737 | 0.767 | 0.772 | 0.783 |
| ETAY8  | BY |        |        |        |       |       |       |       |
| Y8     |    | 0.674  | 0.690  | 0.696  | 0.724 | 0.751 | 0.756 | 0.765 |
| ETAY9  | BY |        |        |        |       |       |       |       |
| Y9     |    | 0.670  | 0.678  | 0.683  | 0.711 | 0.739 | 0.743 | 0.752 |
| ETAY10 | BY |        |        |        |       |       |       |       |
| Y10    |    | 0.707  | 0.717  | 0.721  | 0.753 | 0.780 | 0.786 | 0.796 |
| ETAY11 | BY |        |        |        |       |       |       |       |
| Y11    |    | 0.698  | 0.706  | 0.709  | 0.740 | 0.768 | 0.774 | 0.784 |
| ETAY12 | BY |        |        |        |       |       |       |       |
| Y12    |    | 0.738  | 0.752  | 0.759  | 0.791 | 0.819 | 0.822 | 0.832 |
| ETAX2  | ON |        |        |        |       |       |       |       |
| ETAX1  |    | 0.005  | 0.011  | 0.015  | 0.036 | 0.058 | 0.064 | 0.070 |
| ETAY1  |    | -0.016 | -0.011 | -0.007 | 0.012 | 0.030 | 0.035 | 0.040 |
| ETAX3  | ON |        |        |        |       |       |       |       |
| ETAX2  |    | 0.003  | 0.011  | 0.015  | 0.037 | 0.060 | 0.065 | 0.075 |
| ETAY2  |    | -0.019 | -0.012 | -0.008 | 0.014 | 0.035 | 0.039 | 0.045 |
| ETAX4  | ON |        |        |        |       |       |       |       |
| ETAX3  |    | 0.003  | 0.011  | 0.015  | 0.037 | 0.062 | 0.067 | 0.077 |
| ETAY3  |    | -0.020 | -0.013 | -0.008 | 0.014 | 0.035 | 0.039 | 0.045 |
| ETAX5  | ON |        |        |        |       |       |       |       |
| ETAX4  |    | 0.002  | 0.010  | 0.014  | 0.036 | 0.057 | 0.063 | 0.070 |
| ETAY4  |    | -0.019 | -0.012 | -0.008 | 0.014 | 0.036 | 0.040 | 0.047 |
| ETAX6  | ON |        |        |        |       |       |       |       |
| ETAX5  |    | 0.003  | 0.011  | 0.015  | 0.038 | 0.063 | 0.067 | 0.079 |

|           |        |        |        |        |       |       |       |
|-----------|--------|--------|--------|--------|-------|-------|-------|
| ETAY5     | -0.021 | -0.013 | -0.008 | 0.014  | 0.036 | 0.041 | 0.047 |
| ETAX7 ON  |        |        |        |        |       |       |       |
| ETAX6     | 0.003  | 0.010  | 0.014  | 0.035  | 0.057 | 0.063 | 0.071 |
| ETAY6     | -0.017 | -0.010 | -0.007 | 0.012  | 0.032 | 0.036 | 0.041 |
| ETAX8 ON  |        |        |        |        |       |       |       |
| ETAX7     | 0.003  | 0.011  | 0.015  | 0.037  | 0.062 | 0.067 | 0.075 |
| ETAY7     | -0.016 | -0.011 | -0.007 | 0.012  | 0.031 | 0.036 | 0.041 |
| ETAX9 ON  |        |        |        |        |       |       |       |
| ETAX8     | 0.003  | 0.010  | 0.014  | 0.035  | 0.057 | 0.062 | 0.072 |
| ETAY8     | -0.015 | -0.010 | -0.006 | 0.011  | 0.028 | 0.032 | 0.038 |
| ETAX10 ON |        |        |        |        |       |       |       |
| ETAX9     | 0.002  | 0.010  | 0.014  | 0.037  | 0.059 | 0.064 | 0.073 |
| ETAY9     | -0.015 | -0.009 | -0.006 | 0.011  | 0.027 | 0.031 | 0.037 |
| ETAX11 ON |        |        |        |        |       |       |       |
| ETAX10    | 0.003  | 0.010  | 0.015  | 0.037  | 0.059 | 0.065 | 0.077 |
| ETAY10    | -0.017 | -0.010 | -0.007 | 0.012  | 0.030 | 0.035 | 0.039 |
| ETAX12 ON |        |        |        |        |       |       |       |
| ETAX11    | 0.005  | 0.010  | 0.014  | 0.034  | 0.056 | 0.059 | 0.069 |
| ETAY11    | -0.015 | -0.009 | -0.006 | 0.011  | 0.027 | 0.031 | 0.035 |
| ETAY2 ON  |        |        |        |        |       |       |       |
| ETAY1     | -0.013 | -0.004 | 0.002  | 0.027  | 0.052 | 0.057 | 0.068 |
| ETAX1     | -0.043 | -0.034 | -0.030 | -0.012 | 0.007 | 0.012 | 0.019 |
| ETAY3 ON  |        |        |        |        |       |       |       |
| ETAY2     | -0.017 | -0.005 | 0.002  | 0.031  | 0.060 | 0.065 | 0.076 |
| ETAX2     | -0.043 | -0.035 | -0.033 | -0.012 | 0.008 | 0.012 | 0.021 |
| ETAY4 ON  |        |        |        |        |       |       |       |
| ETAY3     | -0.015 | -0.005 | 0.002  | 0.029  | 0.056 | 0.060 | 0.073 |
| ETAX3     | -0.044 | -0.034 | -0.031 | -0.012 | 0.007 | 0.010 | 0.017 |
| ETAY5 ON  |        |        |        |        |       |       |       |
| ETAY4     | -0.015 | -0.005 | 0.002  | 0.030  | 0.059 | 0.065 | 0.075 |
| ETAX4     | -0.042 | -0.033 | -0.031 | -0.011 | 0.007 | 0.011 | 0.017 |
| ETAY6 ON  |        |        |        |        |       |       |       |
| ETAY5     | -0.018 | -0.006 | 0.002  | 0.033  | 0.065 | 0.070 | 0.081 |
| ETAX5     | -0.049 | -0.038 | -0.035 | -0.013 | 0.008 | 0.013 | 0.022 |
| ETAY7 ON  |        |        |        |        |       |       |       |
| ETAY6     | -0.017 | -0.007 | 0.001  | 0.031  | 0.059 | 0.066 | 0.078 |
| ETAX6     | -0.049 | -0.038 | -0.034 | -0.013 | 0.008 | 0.012 | 0.019 |
| ETAY8 ON  |        |        |        |        |       |       |       |
| ETAY7     | -0.017 | -0.006 | 0.002  | 0.032  | 0.061 | 0.065 | 0.076 |
| ETAX7     | -0.052 | -0.042 | -0.038 | -0.014 | 0.009 | 0.013 | 0.021 |

|         |      |        |        |        |        |       |       |       |
|---------|------|--------|--------|--------|--------|-------|-------|-------|
| ETAY9   | ON   |        |        |        |        |       |       |       |
| ETAY8   |      | -0.019 | -0.006 | 0.001  | 0.032  | 0.060 | 0.066 | 0.080 |
| ETAX8   |      | -0.055 | -0.043 | -0.039 | -0.015 | 0.009 | 0.014 | 0.022 |
| ETAY10  | ON   |        |        |        |        |       |       |       |
| ETAY9   |      | -0.015 | -0.005 | 0.001  | 0.027  | 0.052 | 0.056 | 0.067 |
| ETAX9   |      | -0.052 | -0.040 | -0.037 | -0.014 | 0.008 | 0.012 | 0.021 |
| ETAY11  | ON   |        |        |        |        |       |       |       |
| ETAY10  |      | -0.015 | -0.006 | 0.002  | 0.031  | 0.061 | 0.064 | 0.078 |
| ETAX10  |      | -0.052 | -0.042 | -0.038 | -0.014 | 0.009 | 0.015 | 0.024 |
| ETAY12  | ON   |        |        |        |        |       |       |       |
| ETAY11  |      | -0.014 | -0.005 | 0.001  | 0.026  | 0.049 | 0.054 | 0.063 |
| ETAX11  |      | -0.046 | -0.036 | -0.033 | -0.012 | 0.007 | 0.010 | 0.018 |
| ETAX1   | WITH |        |        |        |        |       |       |       |
| ETAY1   |      | 0.028  | 0.060  | 0.080  | 0.162  | 0.236 | 0.249 | 0.270 |
| IX      |      | 0.000  | 0.000  | 0.000  | 0.000  | 0.000 | 0.000 | 0.000 |
| SX      |      | 0.000  | 0.000  | 0.000  | 0.000  | 0.000 | 0.000 | 0.000 |
| IY      |      | 0.000  | 0.000  | 0.000  | 0.000  | 0.000 | 0.000 | 0.000 |
| SY      |      | 0.000  | 0.000  | 0.000  | 0.000  | 0.000 | 0.000 | 0.000 |
| GQOL    |      | -0.113 | -0.093 | -0.081 | -0.021 | 0.037 | 0.047 | 0.063 |
| GQOLPRE |      | -0.083 | -0.062 | -0.051 | 0.005  | 0.068 | 0.081 | 0.100 |
| ETAX2   | WITH |        |        |        |        |       |       |       |
| ETAY2   |      | 0.093  | 0.103  | 0.107  | 0.129  | 0.154 | 0.157 | 0.164 |
| ETAX3   | WITH |        |        |        |        |       |       |       |
| ETAY3   |      | 0.097  | 0.107  | 0.111  | 0.133  | 0.155 | 0.160 | 0.166 |
| ETAX4   | WITH |        |        |        |        |       |       |       |
| ETAY4   |      | 0.099  | 0.106  | 0.109  | 0.131  | 0.153 | 0.159 | 0.167 |
| ETAX5   | WITH |        |        |        |        |       |       |       |
| ETAY5   |      | 0.098  | 0.104  | 0.109  | 0.129  | 0.153 | 0.158 | 0.165 |
| ETAX6   | WITH |        |        |        |        |       |       |       |
| ETAY6   |      | 0.111  | 0.119  | 0.123  | 0.149  | 0.174 | 0.179 | 0.190 |
| ETAX7   | WITH |        |        |        |        |       |       |       |
| ETAY7   |      | 0.113  | 0.117  | 0.122  | 0.148  | 0.172 | 0.177 | 0.184 |
| ETAX8   | WITH |        |        |        |        |       |       |       |
| ETAY8   |      | 0.116  | 0.125  | 0.129  | 0.159  | 0.184 | 0.189 | 0.201 |
| ETAX9   | WITH |        |        |        |        |       |       |       |
| ETAY9   |      | 0.119  | 0.126  | 0.132  | 0.160  | 0.187 | 0.193 | 0.205 |
| ETAX10  | WITH |        |        |        |        |       |       |       |
| ETAY10  |      | 0.106  | 0.116  | 0.121  | 0.144  | 0.169 | 0.175 | 0.183 |
| ETAX11  | WITH |        |        |        |        |       |       |       |
| ETAY11  |      | 0.113  | 0.119  | 0.125  | 0.151  | 0.177 | 0.181 | 0.188 |

|         |      |        |        |        |        |        |        |        |
|---------|------|--------|--------|--------|--------|--------|--------|--------|
| ETAX12  | WITH |        |        |        |        |        |        |        |
| ETAY12  |      | 0.087  | 0.095  | 0.098  | 0.119  | 0.140  | 0.144  | 0.153  |
| IX      | WITH |        |        |        |        |        |        |        |
| SX      |      | -0.323 | -0.295 | -0.277 | -0.203 | -0.104 | -0.080 | -0.042 |
| IY      |      | 0.422  | 0.431  | 0.437  | 0.489  | 0.532  | 0.539  | 0.558  |
| SY      |      | -0.446 | -0.376 | -0.346 | -0.238 | -0.116 | -0.093 | -0.059 |
| GQOLPRE |      | -0.027 | -0.003 | 0.006  | 0.067  | 0.127  | 0.136  | 0.163  |
| GQOL    |      | -0.002 | 0.024  | 0.034  | 0.093  | 0.154  | 0.163  | 0.185  |
| ETAY1   |      | 0.000  | 0.000  | 0.000  | 0.000  | 0.000  | 0.000  | 0.000  |
| SX      | WITH |        |        |        |        |        |        |        |
| IY      |      | -0.294 | -0.240 | -0.219 | -0.127 | -0.035 | -0.016 | 0.011  |
| SY      |      | -0.125 | 0.024  | 0.057  | 0.301  | 0.521  | 0.596  | 0.694  |
| GQOLPRE |      | -0.167 | -0.117 | -0.095 | 0.011  | 0.114  | 0.139  | 0.180  |
| GQOL    |      | -0.195 | -0.150 | -0.134 | -0.027 | 0.088  | 0.108  | 0.148  |
| ETAY1   |      | 0.000  | 0.000  | 0.000  | 0.000  | 0.000  | 0.000  | 0.000  |
| IY      | WITH |        |        |        |        |        |        |        |
| SY      |      | -0.748 | -0.700 | -0.676 | -0.562 | -0.417 | -0.392 | -0.311 |
| GQOLPRE |      | -0.045 | -0.023 | -0.012 | 0.054  | 0.116  | 0.124  | 0.144  |
| GQOL    |      | 0.106  | 0.127  | 0.140  | 0.196  | 0.260  | 0.269  | 0.284  |
| ETAY1   |      | 0.000  | 0.000  | 0.000  | 0.000  | 0.000  | 0.000  | 0.000  |
| SY      | WITH |        |        |        |        |        |        |        |
| GQOLPRE |      | -0.016 | 0.047  | 0.064  | 0.175  | 0.286  | 0.319  | 0.382  |
| GQOL    |      | -0.219 | -0.163 | -0.141 | -0.031 | 0.069  | 0.084  | 0.115  |
| ETAY1   |      | 0.000  | 0.000  | 0.000  | 0.000  | 0.000  | 0.000  | 0.000  |
| GQOL    | WITH |        |        |        |        |        |        |        |
| GQOLPRE |      | 0.539  | 0.556  | 0.565  | 0.612  | 0.652  | 0.660  | 0.677  |
| ETAY1   | WITH |        |        |        |        |        |        |        |
| GQOL    |      | -0.122 | -0.102 | -0.094 | -0.039 | 0.013  | 0.022  | 0.035  |
| GQOLPRE |      | -0.044 | -0.022 | -0.012 | 0.056  | 0.116  | 0.127  | 0.147  |
| SALF    | WITH |        |        |        |        |        |        |        |
| SALFPRE |      | 0.190  | 0.209  | 0.218  | 0.261  | 0.307  | 0.316  | 0.336  |
| SALM    | WITH |        |        |        |        |        |        |        |
| SALMPRE |      | 0.142  | 0.179  | 0.195  | 0.246  | 0.295  | 0.303  | 0.326  |
| RELP    | WITH |        |        |        |        |        |        |        |
| RELPPRE |      | 0.296  | 0.315  | 0.325  | 0.373  | 0.417  | 0.424  | 0.439  |
| QOL     | WITH |        |        |        |        |        |        |        |
| QOLPRE  |      | 0.010  | 0.044  | 0.054  | 0.133  | 0.194  | 0.206  | 0.226  |
| Means   |      |        |        |        |        |        |        |        |
| IX      |      | 2.185  | 2.220  | 2.237  | 2.328  | 2.431  | 2.452  | 2.482  |
| SX      |      | -0.288 | -0.248 | -0.233 | -0.139 | -0.062 | -0.045 | -0.003 |
| IY      |      | 1.148  | 1.167  | 1.182  | 1.249  | 1.324  | 1.344  | 1.381  |
| SY      |      | -0.685 | -0.557 | -0.518 | -0.370 | -0.260 | -0.247 | -0.226 |

[illegible]

|                    |       |       |       |       |       |       |       |
|--------------------|-------|-------|-------|-------|-------|-------|-------|
| ETAY9              | 0.000 | 0.000 | 0.000 | 0.000 | 0.000 | 0.000 | 0.000 |
| ETAY10             | 0.000 | 0.000 | 0.000 | 0.000 | 0.000 | 0.000 | 0.000 |
| ETAY11             | 0.000 | 0.000 | 0.000 | 0.000 | 0.000 | 0.000 | 0.000 |
| ETAY12             | 0.000 | 0.000 | 0.000 | 0.000 | 0.000 | 0.000 | 0.000 |
| Variances          |       |       |       |       |       |       |       |
| GQOL               | 1.000 | 1.000 | 1.000 | 1.000 | 1.000 | 1.000 | 1.000 |
| GQOLPRE            | 1.000 | 1.000 | 1.000 | 1.000 | 1.000 | 1.000 | 1.000 |
| IX                 | 1.000 | 1.000 | 1.000 | 1.000 | 1.000 | 1.000 | 1.000 |
| SX                 | 1.000 | 1.000 | 1.000 | 1.000 | 1.000 | 1.000 | 1.000 |
| IY                 | 1.000 | 1.000 | 1.000 | 1.000 | 1.000 | 1.000 | 1.000 |
| SY                 | 1.000 | 1.000 | 1.000 | 1.000 | 1.000 | 1.000 | 1.000 |
| ETAX1              | 1.000 | 1.000 | 1.000 | 1.000 | 1.000 | 1.000 | 1.000 |
| ETAY1              | 1.000 | 1.000 | 1.000 | 1.000 | 1.000 | 1.000 | 1.000 |
| Residual Variances |       |       |       |       |       |       |       |
| SALF               | 0.705 | 0.731 | 0.741 | 0.781 | 0.825 | 0.832 | 0.846 |
| SALFPRE            | 0.719 | 0.740 | 0.750 | 0.796 | 0.834 | 0.842 | 0.853 |
| SALM               | 0.495 | 0.513 | 0.523 | 0.574 | 0.618 | 0.628 | 0.642 |
| SALMPRE            | 0.446 | 0.460 | 0.469 | 0.521 | 0.576 | 0.588 | 0.616 |
| RELP               | 0.578 | 0.595 | 0.604 | 0.651 | 0.695 | 0.702 | 0.721 |
| RELPPRE            | 0.617 | 0.632 | 0.643 | 0.689 | 0.733 | 0.740 | 0.761 |
| QOL                | 0.319 | 0.341 | 0.349 | 0.403 | 0.457 | 0.464 | 0.479 |
| QOLPRE             | 0.470 | 0.495 | 0.506 | 0.560 | 0.615 | 0.625 | 0.647 |
| Y1                 | 0.000 | 0.000 | 0.000 | 0.000 | 0.000 | 0.000 | 0.000 |
| Y2                 | 0.000 | 0.000 | 0.000 | 0.000 | 0.000 | 0.000 | 0.000 |
| Y3                 | 0.000 | 0.000 | 0.000 | 0.000 | 0.000 | 0.000 | 0.000 |
| Y4                 | 0.000 | 0.000 | 0.000 | 0.000 | 0.000 | 0.000 | 0.000 |
| Y5                 | 0.000 | 0.000 | 0.000 | 0.000 | 0.000 | 0.000 | 0.000 |
| Y6                 | 0.000 | 0.000 | 0.000 | 0.000 | 0.000 | 0.000 | 0.000 |
| Y7                 | 0.000 | 0.000 | 0.000 | 0.000 | 0.000 | 0.000 | 0.000 |
| Y8                 | 0.000 | 0.000 | 0.000 | 0.000 | 0.000 | 0.000 | 0.000 |
| Y9                 | 0.000 | 0.000 | 0.000 | 0.000 | 0.000 | 0.000 | 0.000 |
| Y10                | 0.000 | 0.000 | 0.000 | 0.000 | 0.000 | 0.000 | 0.000 |
| Y11                | 0.000 | 0.000 | 0.000 | 0.000 | 0.000 | 0.000 | 0.000 |
| Y12                | 0.000 | 0.000 | 0.000 | 0.000 | 0.000 | 0.000 | 0.000 |
| X1                 | 0.000 | 0.000 | 0.000 | 0.000 | 0.000 | 0.000 | 0.000 |
| X2                 | 0.000 | 0.000 | 0.000 | 0.000 | 0.000 | 0.000 | 0.000 |
| X3                 | 0.000 | 0.000 | 0.000 | 0.000 | 0.000 | 0.000 | 0.000 |
| X4                 | 0.000 | 0.000 | 0.000 | 0.000 | 0.000 | 0.000 | 0.000 |
| X5                 | 0.000 | 0.000 | 0.000 | 0.000 | 0.000 | 0.000 | 0.000 |
| X6                 | 0.000 | 0.000 | 0.000 | 0.000 | 0.000 | 0.000 | 0.000 |
| X7                 | 0.000 | 0.000 | 0.000 | 0.000 | 0.000 | 0.000 | 0.000 |
| X8                 | 0.000 | 0.000 | 0.000 | 0.000 | 0.000 | 0.000 | 0.000 |
| X9                 | 0.000 | 0.000 | 0.000 | 0.000 | 0.000 | 0.000 | 0.000 |
| X10                | 0.000 | 0.000 | 0.000 | 0.000 | 0.000 | 0.000 | 0.000 |
| X11                | 0.000 | 0.000 | 0.000 | 0.000 | 0.000 | 0.000 | 0.000 |
| X12                | 0.000 | 0.000 | 0.000 | 0.000 | 0.000 | 0.000 | 0.000 |
| ETAX2              | 0.995 | 0.996 | 0.997 | 0.998 | 1.000 | 1.000 | 1.000 |
| ETAX3              | 0.994 | 0.996 | 0.996 | 0.998 | 1.000 | 1.000 | 1.000 |
| ETAX4              | 0.994 | 0.996 | 0.996 | 0.998 | 1.000 | 1.000 | 1.000 |
| ETAX5              | 0.995 | 0.996 | 0.996 | 0.998 | 1.000 | 1.000 | 1.000 |
| ETAX6              | 0.994 | 0.995 | 0.996 | 0.998 | 1.000 | 1.000 | 1.000 |
| ETAX7              | 0.995 | 0.996 | 0.997 | 0.998 | 1.000 | 1.000 | 1.000 |

|        |       |       |       |       |       |       |       |
|--------|-------|-------|-------|-------|-------|-------|-------|
| ETAX8  | 0.994 | 0.995 | 0.996 | 0.998 | 1.000 | 1.000 | 1.000 |
| ETAX9  | 0.995 | 0.996 | 0.997 | 0.999 | 1.000 | 1.000 | 1.000 |
| ETAX10 | 0.994 | 0.996 | 0.996 | 0.998 | 1.000 | 1.000 | 1.000 |
| ETAX11 | 0.994 | 0.996 | 0.996 | 0.998 | 1.000 | 1.000 | 1.000 |
| ETAX12 | 0.995 | 0.997 | 0.997 | 0.999 | 1.000 | 1.000 | 1.000 |
| ETAY2  | 0.996 | 0.997 | 0.998 | 0.999 | 1.000 | 1.000 | 1.000 |
| ETAY3  | 0.995 | 0.996 | 0.997 | 0.999 | 1.000 | 1.000 | 1.000 |
| ETAY4  | 0.995 | 0.997 | 0.997 | 0.999 | 1.000 | 1.000 | 1.000 |
| ETAY5  | 0.995 | 0.996 | 0.997 | 0.999 | 1.000 | 1.000 | 1.000 |
| ETAY6  | 0.994 | 0.996 | 0.996 | 0.999 | 1.000 | 1.000 | 1.000 |
| ETAY7  | 0.994 | 0.996 | 0.997 | 0.999 | 1.000 | 1.000 | 1.000 |
| ETAY8  | 0.995 | 0.996 | 0.997 | 0.999 | 1.000 | 1.000 | 1.000 |
| ETAY9  | 0.994 | 0.996 | 0.997 | 0.999 | 1.000 | 1.000 | 1.000 |
| ETAY10 | 0.996 | 0.997 | 0.998 | 0.999 | 1.000 | 1.000 | 1.000 |
| ETAY11 | 0.994 | 0.996 | 0.997 | 0.999 | 1.000 | 1.000 | 1.000 |
| ETAY12 | 0.997 | 0.997 | 0.998 | 0.999 | 1.000 | 1.000 | 1.000 |
